# Supplementary material
Source: PubMed Central journal article supplement (PMC3135957)
Supplement: supp_pp.111.173724_173724Supplemental_data.pdf [file supp_pp.111.173724_173724Supplemental_data.pdf]

# Figure S1

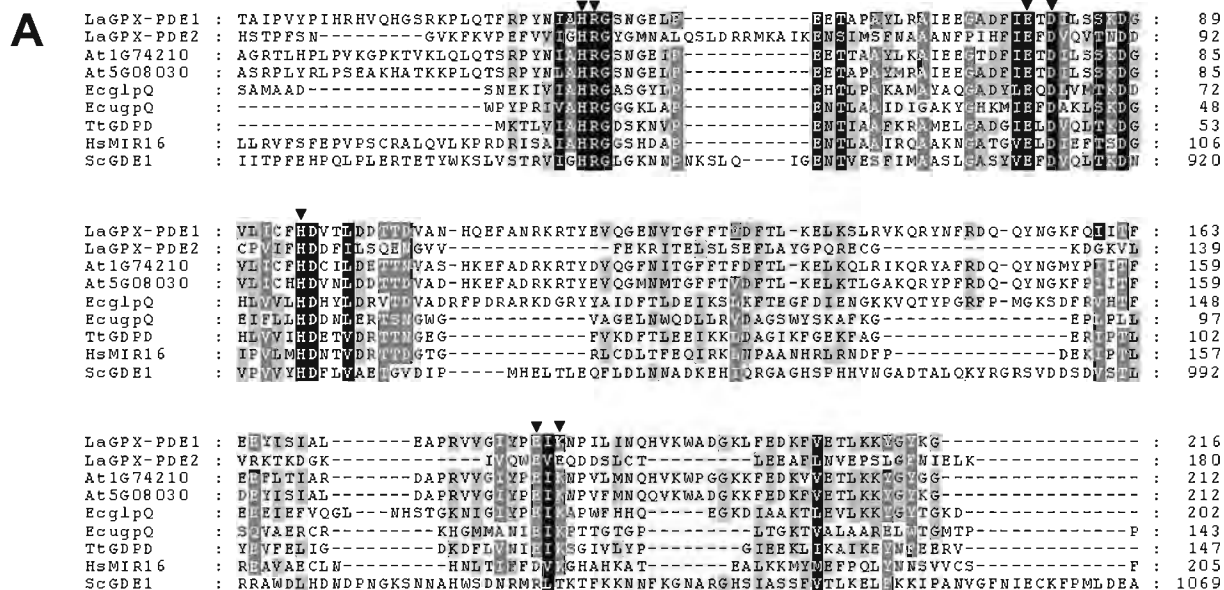

**B**

| % identity  | LaGPX-PDE1 | % identity  | LaGPX-PDE2 |
|-------------|------------|-------------|------------|
| LaGPX-PDE2  | 16         | LaGPX-PDE1  | 16         |
| Gm17g08680  | 79         | Gm19g27060  | 75         |
| At1g74210   | 70         | At3g02040   | 64         |
| Os03g40670  | 68         | Os02g31030  | 61         |
| Sb03g035370 | 68         | Sb04g021010 | 57         |

## Supplemental Figure S1. Alignment of the Conserved Catalytic Domain of White Lupin Glycerophosphodiester Phosphodiesterases (GPX-PDEs) with the Orthologs of Various Species and the Amino Acid Identity of the Corresponding Plant Orthologs.

(A) Alignment of the deduced amino acids residing throughout the catalytic domain of GPX-PDEs from plants, animals, bacteria and yeast. La, *Lupinus albus*; At, *Arabidopsis thaliana*; Ec, *Escherichia coli*; Tt, *Thermoanaerobacter tengcongensis*; Hs, *Homo sapiens*; Sc, *Saccharomyces cerevisiae*. ▼ Represents conserved active site residues.

(B) The deduced amino acid identity of white lupin GPX-PDEs compared to those of other plant orthologs. La, *Lupinus alba*; Gm, *Glycine max*; At, *Arabidopsis thaliana*; Os, *Oryza sativa*; Sb, *Sorghum bicolor*.

## Figure S2

**A** >GPX-PDE1

MSVSMASSTSFASLVFLLIIGCTAIPVYPIHRHVQHGSRKPLQTFRPYN 50  
\*  
IAHRGSNGELPEETAPAYLRAIEEGADFIEDILSSKDGVLICFHDVTLD 100  
\* \* \*  
DTTDVANHQEFANRKR<sup>\*</sup>TYEVQGE<sup>□</sup>NVTGFFTVDF<sup>\*</sup>TLKELKSLRVKQRYNFR 150  
\* \* \*  
DQQYNGKFQIITFEEY<sup>\*</sup>ISIALEAPRVVGIYPEIKNPILINQHVKWADGKL 200  
FEDKFVETLKKYGYK<sup>\*</sup>GSYLSKDWLKQPAFIQSFAP<sup>\*</sup>TSLVYTSNQTDLPKI 250  
\* \*  
LLIDDITIPTQDTNQS<sup>\*</sup>WEITS<sup>\*\*</sup>DSYFEYIKDYVVGIGPWKETVVTVNNY 300  
\* \*  
LQTPSDLVKRAHAHN<sup>\*</sup>LQVHTY<sup>\*</sup>TYR<sup>\*</sup>NENKFLCFNFNQDPY<sup>\*</sup>QEYDY<sup>\*</sup>WVKKIG 350  
\* \*  
VDGLFTDFTGSLHKYQEW<sup>\*</sup>TSSNRHNESDDKTASRLLHKIASLVTSY 396  
\*

**B** >GPX-PDE2

MALKAFHV<sup>□</sup>S<sup>□</sup>DIPSIDIVPETHLSLHSTPFSNGVKFKVPEFVVIGHRGYGM 50  
\*  
NALQSLDRRMKAIKENSIMSFNAAANFPIHFIEFDVQVTNDDCPVIFHDD 100  
FIL<sup>\*</sup>SQENG<sup>\*</sup>VVFEKRITELSL<sup>\*</sup>SEFLAYGPQRECGKDGKVLVRK<sup>\*</sup>TKDGKIVQ 150  
\* \* \*  
WEVEQDDSLCTLEEAF<sup>\*</sup>LNVEPSLGFNIELKFDDHIVYHQDYLSHVLQAIL 200  
\*  
KVVF<sup>\*</sup>DNAKNRPIIFSTFQPDAA<sup>\*</sup>SLVKKLQSTYPVFFLTNGGCEIYEDKRR 250  
\*  
N<sup>\*</sup>SLEEALKLCLENGLQGIVSEIKGVFRNPAIVTKIKESEL<sup>\*</sup>SLTYGSLNN 300  
\* \*  
VPEAVYMQHLMGIDGVIVDLVQEITEAVTNLITSAKVVVDEEGLNEK<sup>\*</sup>LKL 350  
\* \*  
HSKPKFS<sup>\*</sup>QLELSFLLK<sup>\*</sup>LIPQLIQI 374  
\* \* \*

### Supplemental Figure S2. Analysis of Deduced Amino Acid Sequences of *GPX-PDE1* and *GPX-PDE2*.

(A) Predicted post-translational modification of *GPX-PDE1* and (B) *GPX-PDE2* deduced amino acid sequence. Predicted signal peptide is underlined, the putative N-glycosylation sites are boxed and the putative phosphorylation sites are indicated by asterisks. Numbers at the right indicate the position of amino acids.

**Figure S3**

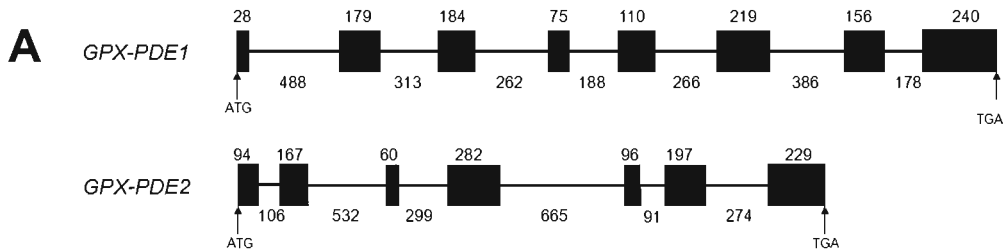

**B** >GPX-PDE1 promoter sequence

```

-1751 AACAAACTTTTTCTACATAAAGAACTACGTAACTTTGATTCTCAGTTAG
-1701 CTATAGGGATACGTAAGAGACCTTACATTGTCAAGCACAAATAACAAAAAT
-1651 TTGTCATTTTAAATAATCAAAATAACTTTAAAAGTATAAAATTAAGTCATGCAA
-1601 TTTAGTGATGAGTATTAGGGGTGAACGTGGGTCGGGTTGGGACGGGTTAA
-1551 GGTGGTTCCTTACCCGACCCATAAATGTTGGTCGGGTCATTTTTTTTAAACC
-1501 TAGACCAGACCTTAGACTTGAAGTTAACGCGATCCTAAATATTCAAATGG
-1451 TCAACCTTTTAAACTCGGACTCGACCCTAGACCCGATTAAATATAATGTAA
-1401 TCTCATTTTTAGATAAAAGTCTTCTAAAATATTATTTATTATTGTGAATATGT
-1351 AATTTGACATATAAAATAATATATGTATATATATTATTAAACAATTTACGT
-1301 ATGATGAAAAAATAGAAAAATCATTGTATTTTCAACAAAAAGTATCATT
-1251 ACTTTATACACATTTGAATAGAGACACATACAATGATACACACATCAAGA
-1201 GTGAGTGATCATGGGACGAGTCAATGTTTGGTTCGTACCCGACCCTAATA
-1151 TTGATTGTGCTAAATTTTTGAACTCGAACTCGACCCTAAACCCAAATGACA
-1101 CCCAATCCTATTCAGACCCGATCATGATCGGGCCATGCCGGATGAGCGGG
-1051 TTGGGTCTGGTCTACTCACCCTAAGGGGTACCATTTAAAATGGGTGGA
G-box like W-box
-1001 CACTTG TGGGAGTAAAC TTTTTAAGAAA TTGACC TATTATAATATA TGCC
W-box
-951 TATTTAATGGAGTCTTACACCACAAATCATGTGTGAATA TTGACC AATTA
-901 TAAAAATTAATTAATAATAATAATAATAATAATAATAATAATAATAAGAACAAATA
-851 AAAATATATTTAAAATGTGTGTATACGATATAATAAGATATAAAAAGTTTAT
-801 CTATTTTTCAATATAAAATCATTATATTATCATTGGATAATTAATTAAGTA
-751 CTAATTTCAATTTAGTAATTCATAATTAATTTGGAGAAAAGAAAATCTAGGGG
-701 AAAATAAAATGGGTTCAACTTCTGAAATTGTTTCTCTACTCAAAGAATCAA
-651 AGTCCAAATGTAATTGAACTAGAAAGATTTTCTATATTTTTTACTATAAAAT
-601 ATAATGGTGACTTTAAACAAAATCGTGTATCCGAAGATTAGGGTTAAACAA
-551 GAGCTTAAAAAGTCAAAGTGGAAATTAAGGATAAGCTAAAAGAAAATGGCATA
-501 AACTTAAACATTCAACATAGATTCCTTTCTACTAATTCACACAAACCCTT
-451 TGAAAAGAAAAGAAAAGAAAAGGCATGATAGCTCATCTTTTTGTGCTATG
-401 TATATGTGTATATTAAGAAAACAACGGATTTAGAAATATTGAAGTTTAGTATT
-351 TCTAAAAAAAAGAAAATAAAATATAGAAAATTTTGTGTATATTTTATGCCC
-301 CCACATACAACTCCCTTTGCTTAAAATAAACACTTTATCTTTAAAATATG
-251 ATACCATATGATGGGGATAATTAATGAATAGTAGTTCCAGATATTGGGTT
-201 TCTATAAGAGGGTCGTGCTATATTGGTATTGGTTTGAAGAGTGAAGACT
P1BS
-151 CTTCTAAAGTCAATGGAAATCAGAAAACAATACGGG GTATATTCTTAGACC
-101 CGATACACTATTTAAATCATAATTAATCTATATATATGTACAAAATAAG
-51 TTATAGCTTTCCAAAAACTACACTTTACAATCACAAATGGAGACAGGGGC
-1 CATG

```

Figure S3 (continued)

**C** >GPX-PDE2 promoter sequence

```
-1772 CTGCTCAGTCATAGCTTTCCACTTCATAAGTGCTTCGTTCTCTGCTGCC
-1722 AATAAAAATTAAACATAAAATGTTGGAAAAGTGCTATTAGAGACAGTAAACC
-1672 ATTGAATTGTTGAAAATGCTCGCGAATTGTTTAAACATTTACCTCCATCAAA
-1622 CTAATTTACCTTTCTCTTGTGCTTTGCAATTAGGTGTTCCATATCTCT
-1572 GCTATGCAGATGAGCTTGTAAAGATTAACATATAGTAATCATACAAAAT

                               P I B S
-1522 TCTTTATTAATAATTGAGTTTCAAGGTATATAC TTC TTCATTTGGGCCAT
-1472 TTCTATTTTTAAGAAATTTCCAGTTCACCAATAGTATCAGCATTCTGAGACG
-1422 GAACATTGTCTGCCCTAAATGTAGATGGCAGTATCCAGTAAGGGTCGTTTC
-1372 ACCCCAGCCTCCTGGCGGACCTTATCCAAAGTTTGCACCTCTCCAACCAATA
-1322 CTCCATTATTCCGCTGGTGTGAACTTCGTCTGAATAGCTCAGTTCCTC
-1272 CAGGAGCCACTTTACCGTCAATGTGCTTCAGTAAGTGGTCTAACAGTCCA
-1222 GTATCACC AATGTGCTTACGGGTGGCCATCCTTAGTGAAGGTTGGGTTAT
-1172 GGGATTTCCAGAAAGTTGCACCTTCATCTTTTAAAGACCTCCCACAAGTTTT
-1122 GCTCGGACAACTTATACCTGCATCTCACAGTTGTCTCAACTTAAATATATA
-1072 TTACTAATAAAAAATGACCAAAAACAGAAAGAATATCACACTATTATTTAC

                G-box like                W-box
-1022 CTCTCATCTGACCACCTGTCCCTGCTTTCTTGCTTATTTGACTTCAGCTT
-972  GCTACC ACTTTGGCTCTCACATAATCCTGCTTTTATCTCTCTAAGACGAT
-922  TACGACTAAGGCGCTTTCTTTTCTTAAATTTTGGCATGAAGATAGGTTTA
-872  GGTTTAATGTGTTTTTCTTCATCTTGTGGCTCCTCTTCCCTCAGAGGCACT
-822  GGAAGTAAGCCTACTTCCATACTCTTTATGCTTACAGATGAACATGGCTT
-772  GATGACAAAACCCCCAACGGTCCATCCTTTACGCTTCAGTTAAACATGG
-722  ATCATTTTAGAAATTTGATTCATTAATTTAGAAATATATTTAATTTAAAAA
-672  AAGAAAGAAAGATAAATAGATAAATAGTCGAGTCTTTTCATATTTAGAAATAC
-622  ATTAATATATTAATATATATTTAATATGTGAGAGATTCACTTACTCTAAG
-572  AGTAAATGTTTTAAACTTACTTCCACATCTTAGTCACAAAATCTAGTGGAT
-522  CCAATTGTTTATATTAGTGAGTATATCTAAACCATTGATTTTCCCTAAAAA
-472  TTAATGGATAAGATGTGGAGCAAAGTTTAAAAAATTTACTCCTATAGTAGA
-422  TGGATTCCCTCATTAAATATTGTATCATATATAAATAATAGTTTAAATCT
-372  TAAATAAAAAGTAATAAAAAATAAATAACAATGTATATAAATTTGTACACTA
-322  AAATTATATAAATATTAATCTCTTAATTATCCA TAATATTAAGCATCAAT
-272  AAAATAAATAAATAAATAAATAAATAAATAAATAAATAAATAAATAAATAAATAA

                               W-box
-222  TGGATTGATAAGTGTGCATAAATTGACTAAGAGGTGGACGTTGACAAAACAT

                P I B S                P I B S
-172  AGCAAGAAATTGGAATATCCAGAGCATATAACTTAAACCCAA GAATATTC A

                P I B S
-122  ATGCGAATATCCCTTTCTACATAACCTTTCTCTTTTTTCATATAAAATACT
-72   CAAAACCATTTCAATTTTTCTCAACAACAATAACAATTTCTTGTATTATAC
-22   CCAATTTCTCTTCTTTCTTACTATG
```

## Figure S3 (continued)

### Supplemental Figure S3. Gene Structure and the 5' upstream Cis-element Analysis of *GPX-PDE1* and *GPX-PDE2*.

(A) Gene structure of *GPX-PDE1* and *GPX-PDE2*. Exons are indicated by the boxed regions and introns are represented by lines. Numbers indicate the length of the corresponding exon and intron region.

(B) Sequence of the 1681 bp 5' upstream region of *GPX-PDE1*. The following cis elements are highlighted: the P1BS element (PHR1 transcription factor binding site), two W-box elements (WRKY transcription factor binding site) and a G-box like element.

(C) Sequence of the 1743 bp 5' upstream region of *GPX-PDE2*. The following cis elements are highlighted: four P1BS elements, two W-box elements, one G-box like element and four TATCCA elements.

Element sequence: P1BS element, GNATATNC; W-box sequence, TTGACT/C; G-box element, CACGTG. Numbers to the left indicate the position from the translation start site (underlined and bold).

**Figure S4**

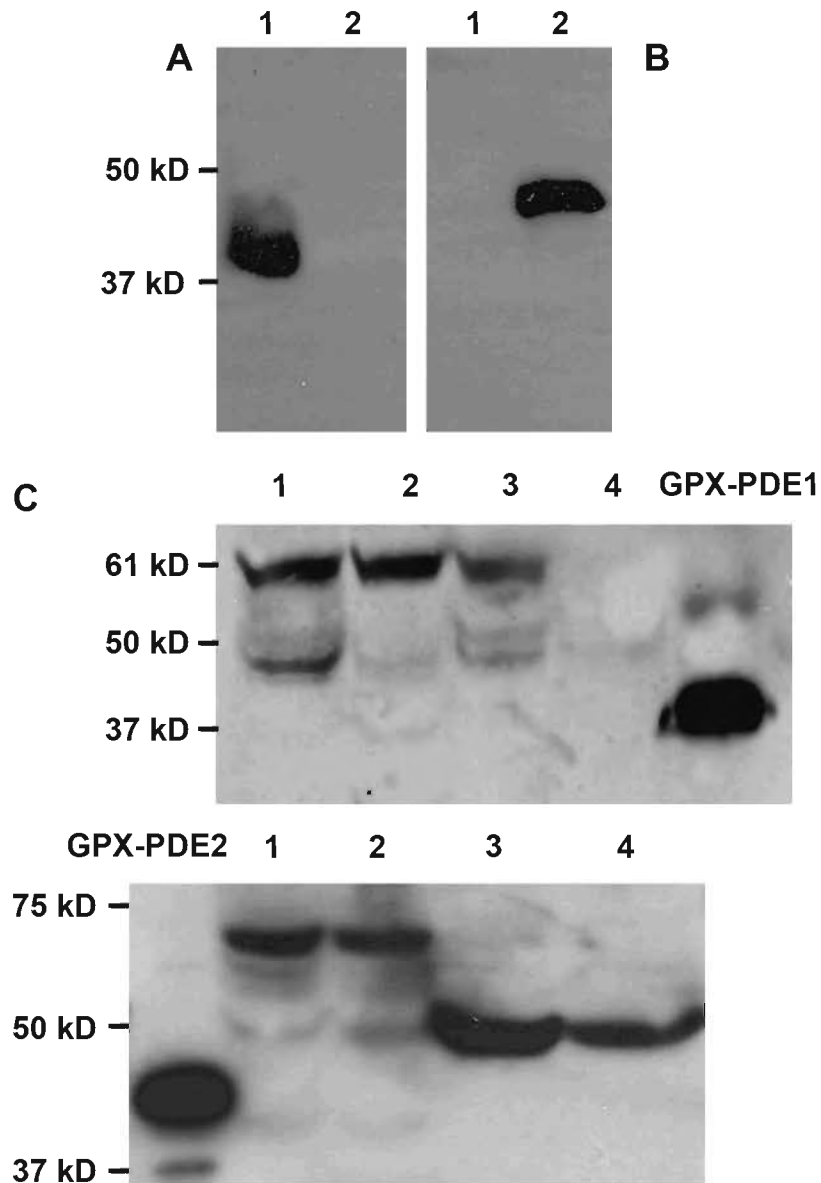

**Supplemental Figure S4. Immunological detection of the GPX-PDE1 and GPX-PDE2 in Cluster Roots of White Lupin Grown Under Pi-sufficient and Pi-deficient Conditions.**

(A) and (B) Immunological detection of GPX-PDE1 and GPX-PDE2. Recombinant LaGPX-PDE proteins were cleaved from GST with thrombin, electrophoresed on an SDS-PAGE gel, immunoblotted and the blots probed with (A) GPX-PDE1 antisera or (B) GPX-PDE2 antisera. Lanes 1 and 2 contain GPX-PDE1 and GPX-PDE2 proteins, respectively. Note the lack of cross reactivity between GPX-PDE1 and GPX-PDE2.

(C) SDS-PAGE gel immunoblot using GPX-PDE1 or GPX-PDE2 antiserum raised against recombinant GPX-PDE1 or GPX-PDE2 protein, following enhanced chemiluminescence detection showing expression of GPX-PDE proteins in a 25-75%  $(\text{NH}_4)_2\text{SO}_4$  precipitated soluble protein and cell wall associated protein extracted from cluster roots of 14 d white lupin plants supplied with -Pi (0 mM) and +Pi (1 mM). Lanes labeled as GPX-PDE1 and GPX-PDE2 are GST cleaved purified recombinant protein; lane 1, -Pi cluster root protein precipitated by 25-75%  $(\text{NH}_4)_2\text{SO}_4$ ; lane 2, +Pi cluster root protein precipitated by 25-75%  $(\text{NH}_4)_2\text{SO}_4$ ; lane 3, -Pi cell wall associated protein; lane 4, +Pi cell wall associated protein. Lanes 1-4 were loaded with 40  $\mu\text{g}$  of protein.

## Figure S5

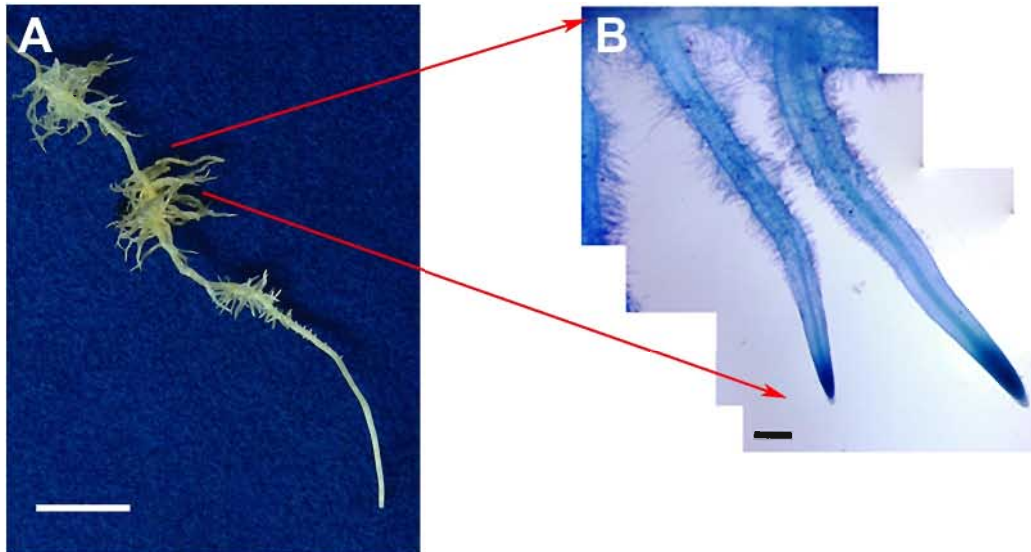

### **Supplemental Figure S5. Cluster Root Development in White Lupin Grown under Pi-Deficient Conditions.**

(A) Phosphorus stress induced white lupin cluster roots appear as waves along secondary roots. Cluster roots from Pi-deficient white lupin 14 days after emergence can comprise greater than 60% of the root mass (Johnson et al., 1994; Keerthisinghe et al., 1998). Note that cluster roots also form on Pi-sufficient roots but comprise 10% or less of the total root mass. Bar = 1 cm.

(B) Rootlets in the most mature zone of cluster roots are densely covered with root hairs. Rootlets and root hairs stained with methylene blue. Bar = 1 mm.

Figure S6

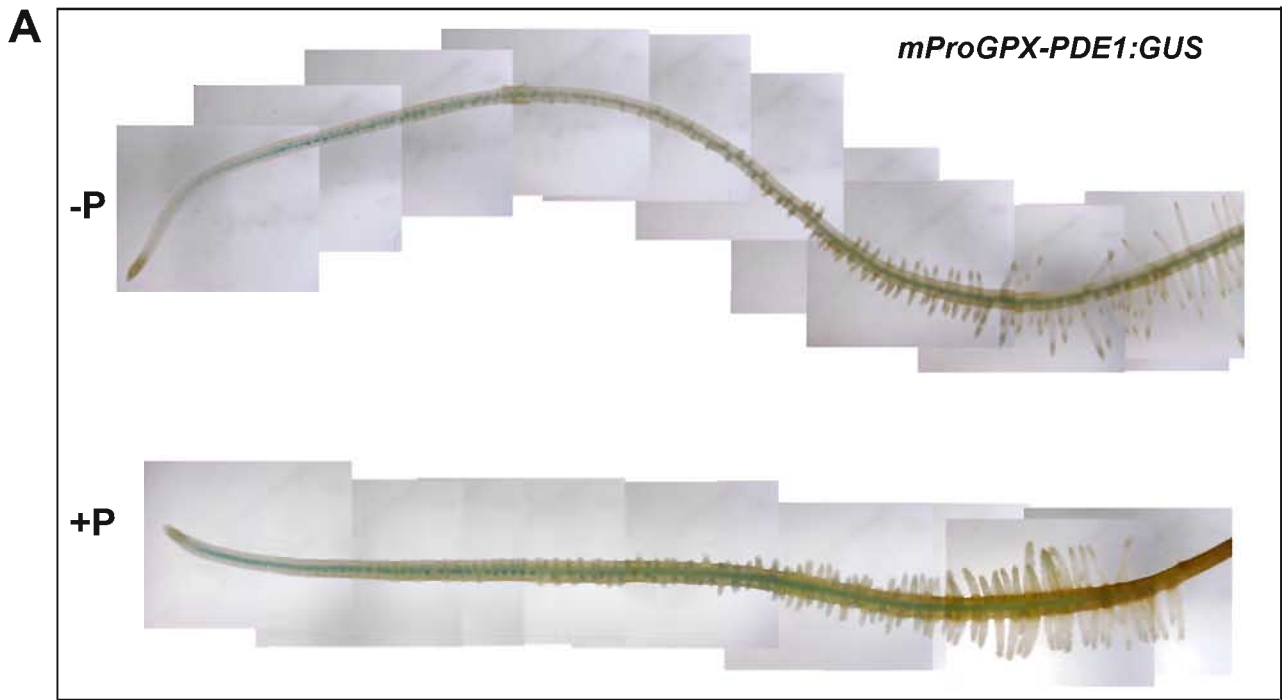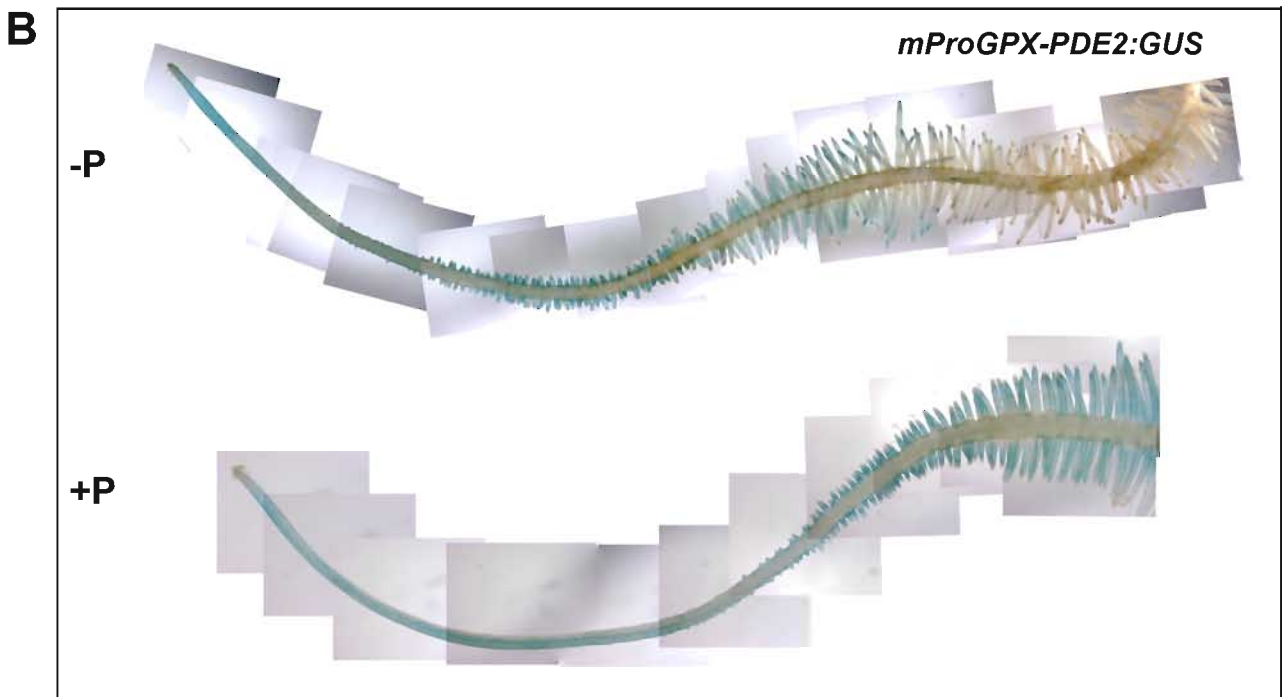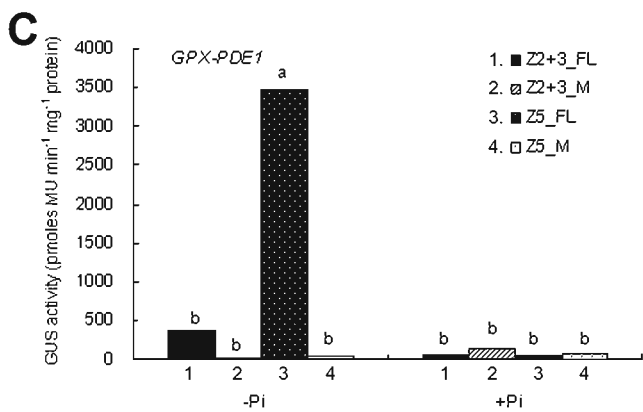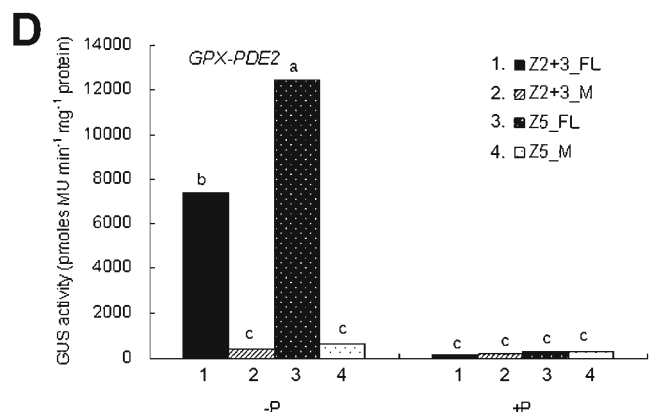



## Figure S6 (continued)

### Supplemental Figure S6. GUS Reporter Gene Activity Driven by the P1BS Mutated Promoter of *GPX-PDE1* or *GPX-PDE2* in Pi-deficient and Pi-sufficient Cluster Roots of White Lupin.

Histochemical localization of GUS activity directed by the P1BS mutated *GPX-PDE1* and *GPX-PDE2* promoter (*mProGPX-PDE1:GUS* and *mProGPX-PDE2:GUS*) was evaluated using *A. rhizogenes* mediated white lupin transformation system.

Transgenic plants were grown under Pi-deficient (0 Pi) and Pi-sufficient (1 mM Pi) conditions for 4 weeks. Transgenic hairy roots were harvested and stained with GUS solution and incubated at 37°C for 1 h.

(A) GUS staining in hairy roots containing the *mProGPX-PDE1:GUS* construct was abolished in both Pi-sufficient and Pi-deficient plants.

(B) GUS staining in hairy roots containing the *mProGPX-PDE2:GUS* construct was strongly reduced in both Pi-sufficient and Pi-deficient plants.

(C) and (D) MUG assays confirmed the negative effect of P1BS mutagenesis on the response of lupin *GPX-PDE1* (C) and *GPX-PDE2* (D) to Pi starvation. The reduction of MUG activity in the P1BS mutated tissue (M) is compared to the MUG activity of the full length promoter (FL). Z2+3, cluster root zone 2 and 3 tissue pooled; Z5, cluster root zone 5 tissue. Lower case letters denote significant differences between treatments ( $P < 0.05$ ). Statistical significance based on four biological replicates.

1 **Supplemental Table 1.** In vitro enzyme activity for recombinant produced GPX-  
 2 PDE1 and GPX-PDE2. Activity represents the average of two assays with protein  
 3 derived from at least two independent transformants selected for each construct.

|                                        | GPX-PDE1                         | GPX-PDE2 |
|----------------------------------------|----------------------------------|----------|
|                                        | nmol/min/mg protein <sup>a</sup> |          |
| GPC-PDE, Ca <sup>2+</sup> <sup>b</sup> | 68                               | 0        |
| GPC-PDE, Mg <sup>2+</sup>              | 0                                | 207      |
| GPI-PDE, Ca <sup>2+</sup> <sup>c</sup> | 0                                | 0        |
| GPI-PDE- Mg <sup>2+</sup>              | 0                                | 714      |

4

5 <sup>a</sup>No detectable activity in the absence of Ca<sup>2+</sup> or Mg<sup>2+</sup>

6 <sup>b</sup>Ca<sup>2+</sup> or Mg<sup>2+</sup> dependent glycerophosphocholine activity

7 <sup>c</sup>Ca<sup>2+</sup> or Mg<sup>2+</sup> dependent glycerophosphoinositol activity

8

**Supplemental Table 2. Oligonucleotides Used in this Study.**

| Primer name   | Sequences (5' - 3')             | Description                                                                             |
|---------------|---------------------------------|-----------------------------------------------------------------------------------------|
| GPX-PDE1sF    | ATCATTGGCTGCACTGCAATC           | Quantitative PCR for cluster root zones, Pi/Phi resupply, dark/light treatment and RNAi |
| GPX-PDE1sR    | CGCGATGTGCAATGTTATATGG          |                                                                                         |
| GPX-PDE2sF    | ACAAAGATCAAGGAATCTGAAC          | Quantitative PCR for cluster root zones, Pi/Phi resupply, dark/light treatment          |
| GPX-PDE2sR    | TAATTCTAAAGCCTATCAGTGTG         |                                                                                         |
| GPX-PDE2qF    | CAGCCAGATGCTGCATGACTAG          | Quantitative PCR for RNAi                                                               |
| GPX-PDE2qR    | CCTTGCAACCCATTCTCCAA            |                                                                                         |
| SAP1qF        | AACACCACACGGCAGTTTTGG           | Quantitative PCR for RNAi                                                               |
| SAP1qR        | TCTGTAAACCTTCCCCAGGTG           |                                                                                         |
| PT1qF         | TGGGCCGAATTTACTACCACG           | Quantitative PCR for RNAi                                                               |
| PT1qR         | CATCAGGGTCATGCCATACAC           |                                                                                         |
| GPX-PDE1RTF   | GTTGCTCATCATTGGCTGCACTG         | RT PCR for RNAi                                                                         |
| GPX-PDE1RTR   | CCAGTGACATTCTCTCCTTGAC          |                                                                                         |
| GPX-PDE2RTF   | CGCGGATCCATGGCTCTTAAAGCTTTTC    | RT PCR for RNAi                                                                         |
| GPX-PDE2RTR   | GCAGCATCTGGCTGGAAAGTTG          |                                                                                         |
| SAP1RTF       | GGAACGGCCCTACTGTATGTTG          | RT PCR for RNAi                                                                         |
| SAP1RTR       | CCAAGGTGCATGCATGAGAACG          |                                                                                         |
| PT1RTF        | GGGAAGCCTGGTACATTGCCTC          | RT PCR for RNAi                                                                         |
| PT1RTR        | GTGGAACAGTTGAACCAACTGG          |                                                                                         |
| GSTGPX-PDE1F  | CGCGGATCCTCTGTTTCCATGGCTTC      | Construction of plasmids for whole and truncated coding region expression in E.coli     |
| GSTiGPX-PDE1F | CGCGGATCCCCTCTACAAACATTTTC      |                                                                                         |
| GSTGPX-PDE1R  | CCGGAATTCCTTGTCAACTTCTCAATAAG A |                                                                                         |

**Supplemental Table 2 (continued from previous page).**

| Primer name        | Sequences (5' - 3')                            | Description                                                                          |
|--------------------|------------------------------------------------|--------------------------------------------------------------------------------------|
| GSTGPX-PDE2F       | CGCGGATCCGCTCTTAAAGCTTTTC                      | Construction of the plasmid for expression in E.coli                                 |
| GSTGPX-PDE2R       | CCGGAATTCTGGCTTTTACTTTCAAATCTG                 |                                                                                      |
| ProGPX-PDE1GUSF    | CCCAAGCTTCCTTACATTGTCAAGCAC                    |                                                                                      |
| ProGPX-PDE1GUSR    | TGCTCTAGAGCCATGGAAACAGACATG                    | Construction of the plasmids for GPX-PDE1 promoter:GUS and P1BS mutated promoter:GUS |
| mProGPX-PDE1GUSF   | AAACAATACGGGGTCCATTCTTAGACCCG                  |                                                                                      |
| mProGPX-PDE1GUSR   | GGTCTAAGAATGGACCCCGTATTGTTTTC                  |                                                                                      |
| ProGPX-PDE2GUSF    | CCCAAGCTTGTGCTTCGTTCTCTGCTGC                   |                                                                                      |
| ProGPX-PDE2GUSR    | TGCTCTAGAGCTTTAAGAGCCATAGTAAG                  |                                                                                      |
| m12ProGPX-PDE2GUSF | CTTAACACCAAGACCATTCAATGCGACCA<br>TCCCTTTCTACAT |                                                                                      |
| m12ProGPX-PDE2GUSR | GTAGAAAGGGATGGTCGCATTGAATGGT<br>CTTGGTGTTAAGTT | Construction of the plasmids for GPX-PDE2 promoter:GUS and P1BS mutated promoter:GUS |
| m3ProGPX-PDE2GUSF  | TAGCAAGAATTGGACCATCCAGAGCATAT<br>AAC           |                                                                                      |
| m3ProGPX-PDE2GUSR  | TATATGCTCTGGATGGTCCAATTCTTGCT<br>ATG           |                                                                                      |
| m4ProGPX-PDE2GUSF  | GAGTTTTCAAGGTCCATACTTCTTCATTT<br>GG            |                                                                                      |
| m4ProGPX-PDE2GUSR  | AAATGAAGAAGTATGGACCTTGAAAACCTC<br>AA           |                                                                                      |

**Supplemental Table 2 (continued from previous page).**

| Primer name        | Sequences (5' - 3')                 | Description                                                                                                  |
|--------------------|-------------------------------------|--------------------------------------------------------------------------------------------------------------|
| GPX-PDE1GFPP1      | GCTCTAGAGAGACCTTACATTGTCAAGC<br>AC  |                                                                                                              |
| GPX-PDE1GFPP2      | CAGGGGCCATGTCTGTTTCCATGGCTTC<br>C   | Construction of<br>the plasmid for<br>GPX-PDE1:EGFP                                                          |
| GPX-PDE1GFPR1      | AAGCCATGGAAACAGACATGGCCCCTGT<br>C   |                                                                                                              |
| GPX-PDE1GFPR2      | CGCGGATCCGACCAAGGAAGCAATTTTA<br>TGC |                                                                                                              |
| RNAiGPX-PDE1F      | CACCAAATATGGATACAAGGGTTC            |                                                                                                              |
| RNAiGPX-PDE1R      | AAGACCCTGGCATACAAATGAGC             | Construction of<br>the plasmids for<br>GPX-PDE1 and<br>GPX-PDE2 RNAi                                         |
| RNAiGPX-PDE2F      | CACCGAAATTGCAAAGCACATACC            |                                                                                                              |
| RNAiGPX-PDE2R      | GCCTATTCTATTAGTGTGAAGGAC            |                                                                                                              |
| pCu416GPX-PDE1F    | CGCGGATCCATGTCTGTTTCCATGGC          |                                                                                                              |
| pCu416tGPX-PDE1F   | CGCGGATCCATGCCTCTACAAACATTTTC       | Construction of<br>plasmid for whole<br>coding region and<br>truncated GPX-<br>PDE1 yeast<br>complementation |
| pCu416GPX-PDE1R    | CCGGAATTCTTGTCAACTTCTCAATAAG<br>A   |                                                                                                              |
| pCu416GPX-PDE2F    | CGCGGATCCATGGCTCTTAAAGCTTTTC        |                                                                                                              |
| pCu416GPX-PDE2R    | CCGGAATTCTGGCTTTTACTTTCAAATCT<br>G  | Construction of<br>plasmid for GPX-<br>PDE2 yeast<br>complementation                                         |
| $\alpha$ -TubulinF | GCCTGATGGACAAATGCC                  | RT PCR for RNAi                                                                                              |
| $\alpha$ -TubulinR | GCCTGCAAATGTCATAGATAGC              |                                                                                                              |
| LysoPLase 1F       | CCTGACCAACTCAAAGCCACCG              | Quantitative PCR<br>for cluster roots                                                                        |
| LysoPLase 1R       | GGAAGAAGTGGAGCGAGGTAGC              |                                                                                                              |
| LysoPLase 2F       | CACTGCGGACGAGTTCTACGC               | Quantitative PCR<br>for cluster roots                                                                        |
| LysoPLase 2R       | GGTGATCGATGGCGCAGGTGGC              |                                                                                                              |

**Supplemental Table 3. Yeast Strains Used in This Study.**

| Strain | Relevant Genotype | Genotype                                                                                             | Source            |
|--------|-------------------|------------------------------------------------------------------------------------------------------|-------------------|
| JPV125 | <i>gde1</i> Δ     | <i>his3</i> Δ1, <i>leu2</i> Δ0, <i>met15</i> Δ0, <i>ura3</i> Δ0, <i>YPL110c::KanMX</i> , <i>MATa</i> | Research Genetics |
| JPV203 | wild type         | <i>his3</i> Δ1, <i>leu2</i> Δ0, <i>met15</i> Δ0, <i>ura3</i> Δ0, <i>MATa</i>                         | Research Genetics |

```

#MEGA

!Title alignment;

!Format

  DataType=Protein

  NSeqs=30 NSites=1347

  Identical=. Missing=? Indel=-;

!Domain=Data;

#La_GPX-PDE2 ----- [ 80]
#Gm19g27060 ----- [ 80]
#Sc_GDE1      MKFGKTFANH RIPEWSSQYV GYKSLKMKIK EITRLQEDIY RAHNKNSYDE GRPPTKMRDS SNSAQNYLDS PKIQKLLASF [ 80]
#Ec_glpQ ----- [ 80]
#Ec_ugpQ ----- [ 80]
#Sc_PGC1 ----- [ 80]
#At1g66980 ----- [ 80]
#At3g20520 ----- [ 80]
#At5g58050 ----- [ 80]
#At5g43300 ----- [ 80]
#At5g58170 ----- [ 80]
#Gg_GDE2 ----- [ 80]
#Mm_GDE3 ----- [ 80]
#Gm17g08680 ----- [ 80]
#Os03g40670 ----- [ 80]
#Stc_glpQ1 ----- [ 80]
#Stc_glpQ2 ----- [ 80]
#At5g41080 ----- [ 80]
#At3g02040 ----- [ 80]
#At1g71340 ----- [ 80]
#Hs_GDE1/Mir16 ----- [ 80]
#Os02g31030 ----- [ 80]
#At1g74210 ----- [ 80]
#At5g55480 ----- [ 80]
#Sb03g035370 ----- [ 80]
#At4g26690 ----- [ 80]
#At5g08030 ----- [ 80]
#Sb04g021010 ----- [ 80]
#La_GPX-PDE1 ----- [ 80]
#At1g66970 ----- [ 80]

#La_GPX-PDE2 ----- [ 160]
#Gm19g27060 ----- [ 160]
#Sc_GDE1      FFAVDRDIEK VDTFYNSQYA EYKKRFRLL SSNQFNEIKS TLVVDANKED AVAQTLLTKD TREMNMLLKG TSQASRLSYH [ 160]
#Ec_glpQ ----- [ 160]
#Ec_ugpQ ----- [ 160]

```

```

#Sc_PGC1 ----- [ 160]
#At1g66980 -----MNS QQSTRTKQML [ 160]
#At3g20520 ----- [ 160]
#At5g58050 -----MLRFF [ 160]
#At5g43300 ----- [ 160]
#At5g58170 -----MLRFI [ 160]
#Gg_GDE2 ----- [ 160]
#Mm_GDE3 ----- [ 160]
#Gm17g08680 ----- [ 160]
#Os03g40670 ----- [ 160]
#Stc_glpQ1 ----- [ 160]
#Stc_glpQ2 ----- [ 160]
#At5g41080 ----- [ 160]
#At3g02040 ----- [ 160]
#At1g71340 ----- [ 160]
#Hs_GDE1/Mir16 ----- [ 160]
#Os02g31030 ----- [ 160]
#At1g74210 ----- [ 160]
#At5g55480 -----MIN MRDNPTMHVL [ 160]
#Sb03g035370 ----- [ 160]
#At4g26690 -----MRG----LL [ 160]
#At5g08030 ----- [ 160]
#Sb04g021010 ----- [ 160]
#La_GPX-PDE1 ----- [ 160]
#At1g66970 -----MNS RPSNPTKLVI [ 160]

#La_GPX-PDE2 ----- [ 240]
#Gm19g27060 ----- [ 240]
#Sc_GDE1 KDDLIEIQSI LAELRKQFRN LKWYAELNKR AFGKILKKLD KKVGTNQMS TMKTRILPLQ FANDSLITKD LSLKTIWEQ [ 240]
#Ec_glpQ ----- [ 240]
#Ec_ugpQ ----- [ 240]
#Sc_PGC1 ----- [ 240]
#At1g66980 QQSSTHLLCG VVLLQLFAAQ VDAQ--RSTS PWQTLSGDAP LVIARGGFSG LFPDSSLAAY QFAMVVSAD VVWCDVQLT [ 240]
#At3g20520 --MACPRVIF LILITFFILQ TAFS----S SWQTLGKPP AVIARGGFSG MFPDSSIQAY QLVNITTSPD VMLWCDLQLT [ 240]
#At5g58050 ILFSLFLHSS VAAPKTPAAA AAVP----AK KWLTLNGQEP AVVARGGFSG LFPDSSISAN DLAIGTSSPG FTMLCNLQMT [ 240]
#At5g43300 ----- [ 240]
#At5g58170 IFFSLFIHLC VAAPQTPAAA AAVP----AK KWLTLNGQEP AVVARGGFSG LFPDSSASAN DLAIGTSSPG LTMLCNLQMT [ 240]
#Gg_GDE2 -----MVKHQPLQ [ 240]
#Mm_GDE3 -----MADSPGC [ 240]
#Gm17g08680 ----- [ 240]
#Os03g40670 ----- [ 240]
#Stc_glpQ1 ----- [ 240]
#Stc_glpQ2 ----- [ 240]
#At5g41080 ----- [ 240]
#At3g02040 ----- [ 240]

```



|                |                                                                                          |        |
|----------------|------------------------------------------------------------------------------------------|--------|
| #At1g71340     | -----                                                                                    | [ 240] |
| #Hs_GDE1/Mir16 | -----                                                                                    | [ 240] |
| #Os02g31030    | -----                                                                                    | [ 240] |
| #At1g74210     | -----                                                                                    | [ 240] |
| #At5g55480     | Q-ASKFLFLA LILIQLLSTQ LFAQ--RSKS PWQTLTGDP LVIARGGFSG LLPDSSLDAY SFVQSQTSVPG AVLWCDVQLT  | [ 240] |
| #Sb03g035370   | -----                                                                                    | [ 240] |
| #At4g26690     | R-ASSLLLCG VILIQLLAAQ IHAQSKKPKS PWPTLTGDP LVIARGGFSG LFPDSSYDAY NFAILTSVPD AVLWCDVQLT   | [ 240] |
| #At5g08030     | -----                                                                                    | [ 240] |
| #Sb04g021010   | -----                                                                                    | [ 240] |
| #La_GPX-PDE1   | -----                                                                                    | [ 240] |
| #At1g66970     | R-SSTLLFCG VVLIHLFAAQ IDAQ--RSTS RWQTLNGDAP LVIARGGFSG LYPDSSIAAY QLATLTSVAD VVLWCDLQLT  | [ 240] |
| #La_GPX-PDE2   | -----                                                                                    | [ 320] |
| #Gm19g27060    | -----                                                                                    | [ 320] |
| #Sc_GDE1       | VIFRINSYER VMRSTSPNAN ANDNTEFFKI ICVFIEEDDS KGLIRELTNL YSELSLIPTR IMISVLNKA LSKSLACIDA   | [ 320] |
| #Ec_glpQ       | -----                                                                                    | [ 320] |
| #Ec_ugpQ       | -----                                                                                    | [ 320] |
| #Sc_PGC1       | -----                                                                                    | [ 320] |
| #At1g66980     | KDGHGICFPD LNLANASNSE EYVYVNRQKSY PVNGVTTKGW FPIDFSLTEL QKVLFSLIRG ILSRSGKFDE NGYSISTVQN | [ 320] |
| #At3g20520     | KDGVGICFPN KLDNGSNVI RIDPHYKER- ----- FSVDFTWKEL SD--VKLAQG VVSRPYIFDD VS-SILAIEE        | [ 320] |
| #At5g58050     | KDVGGLCLSD IRLDNATTIS SVFPKAQKTY KVNGQDLKGW FVIDYDADTI FN-KVTLVQN IFSRPSIFDG QM-SVSAVED  | [ 320] |
| #At5g43300     | -----                                                                                    | [ 320] |
| #At5g58170     | KDVGGLCLSD IILDNATTIS SVFPKAQKTY KVNGQDLKGW FVLVDYDADTI FN-NVTLVQN IFSRPSIFDG QM-SVSAVED | [ 320] |
| #Gg_GDE2       | YYEPQLCLSC LTGIYCRWK RYQRSH---- ----- -DDT TKWERLWFLI                                    | [ 320] |
| #Mm_GDE3       | CSIWARCLHC L---YSCHWR KYPKQK----- -MQT SKCDCIWFGL                                        | [ 320] |
| #Gm17g08680    | -----                                                                                    | [ 320] |
| #Os03g40670    | -----                                                                                    | [ 320] |
| #Stc_glpQ1     | -----                                                                                    | [ 320] |
| #Stc_glpQ2     | -----                                                                                    | [ 320] |
| #At5g41080     | -----                                                                                    | [ 320] |
| #At3g02040     | -----                                                                                    | [ 320] |
| #At1g71340     | -----                                                                                    | [ 320] |
| #Hs_GDE1/Mir16 | -----                                                                                    | [ 320] |
| #Os02g31030    | -----                                                                                    | [ 320] |
| #At1g74210     | -----                                                                                    | [ 320] |
| #At5g55480     | KDAIGLCFPD VKMMNASNIQ DVYPKRKTSY LLNGVPTQDW FTIDFNFKDL TK--VILKQG ILSRSAAPDG NSYGISTVKD  | [ 320] |
| #Sb03g035370   | -----                                                                                    | [ 320] |
| #At4g26690     | KDALGICFPD LTMRNSSSIE AVYPTQKSY PVNGVPTSGW FTIDFSLKDL KD--VNLIRG ILSRKKFDG NSNPIMTVQS    | [ 320] |
| #At5g08030     | -----                                                                                    | [ 320] |
| #Sb04g021010   | -----                                                                                    | [ 320] |
| #La_GPX-PDE1   | -----                                                                                    | [ 320] |
| #At1g66970     | KDGLGICFPD LNLANASTID RVYVNRKSY SVNGVTTKGW FPNDFSLTEL QN--FLLIRG ILSRTDRFDG NGYLSTIED    | [ 320] |
| #La_GPX-PDE2   | -----                                                                                    | [ 400] |
| #Gm19g27060    | -----                                                                                    | [ 400] |

```

#Sc_GDE1      ILKVIPSLND SEDINRRNFF HHHIIAIGKL IRKQEILSRK KKSQPSKYTN SEGEIVTDLR TLHTTLSAPA ESDSITEEEK [ 400]
#Ec_glpQ      ----- [ 400]
#Ec_ugpQ      ----- [ 400]
#Sc_PGC1      ----- [ 400]
#At1g66980    VATQMKPALF WLNQVHDEFY EQHNLSMSSF LLSTSRTVSI DFISSPEVNF FRKIAGGFGN NGPSFVFQFM GKEDFEPTTN [ 400]
#At3g20520    VA-KLTASGL WLNIQDSAFY AKHNLSMRNS VVSLSRRLKV NFISSPGISF LKSMKNSVKP TVTKLIFRFL KQEHIPEFTN [ 400]
#At5g58050    VLGTKPPK-F WLSVQYDAFY MEHKLSPAEY LRSLRFRG-I NVISSPEIGF LKSIGMDAGR AKTKLIFEFK DPEAVEPTTN [ 400]
#At5g43300    ----- [ 400]
#At5g58170    VLGTKPPK-F WLSVQYDAFY MEHKLSPAEY LRSLRFRG-I NVISSPEIGF LKSIGMDAGR AKTKLIFEFK DPEAVEPTTN [ 400]
#Gg_GDE2      LTSSFFLTLV WYFWWEVHN DYNEINWFLY NRMG----- -YWSDWSIPI LVTTAAGFTY ITVLLILALC HIAVGQQMNL [ 400]
#Mm_GDE3      LFLTFLLSLG WLYIGLILLN DLHNFNEFLF RHWG----- -HMDWSLIV LLVVSLLVTY ASLLLLLGLL LQLCGQPLHL [ 400]
#Gm17g08680   ----- [ 400]
#Os03g40670   ----- [ 400]
#Stc_glpQ1    ----- [ 400]
#Stc_glpQ2    ----- [ 400]
#At5g41080    ----- [ 400]
#At3g02040    ----- [ 400]
#At1g71340    ----- [ 400]
#Hs_GDE1/Mir16 ----- [ 400]
#Os02g31030   ----- [ 400]
#At1g74210    ----- [ 400]
#At5g55480    ISTQLKPEGF WLNQVHDAFY AQHNLSMSSF LLSISKTVII DYLLSPEVNF FRNIGRRFGR NGPKFVFRFL EKDDVEVSTN [ 400]
#Sb03g035370  ----- [ 400]
#At4g26690    VSTQMKPSFF WLNQVHDAFY AQHNLSMSSF LVAASKTVLI DFISSPEVNF FKKIAGRFRG NGPSLVFRFL GQDEFEPTTN [ 400]
#At5g08030    ----- [ 400]
#Sb04g021010  ----- [ 400]
#La_GPX-PDE1  ----- [ 400]
#At1g66970    VVTTLNREGF WLNQVHDAFY EQNLSMSSF LLSVSRVSI DFISSPEVNF FKKITGSFGR NGPTFVFQFL GKEDFEPTTN [ 400]

#La_GPX-PDE2  -----MA LK-----AF HVSDIPSIDI VP--ETH-LS [ 480]
#Gm19g27060   -----..V..T.V..L.L...-.NAS.A [ 480]
#Sc_GDE1      SSACTLSYIL EELPIHLRPC LFQHDNYKRT PLHYSCQYGL SEVTKLI IKL M.EWNIWNEI PID.VSAFGD AESLTLPH.C [ 480]
#Ec_glpQ      -----M [ 480]
#Ec_ugpQ      ----- [ 480]
#Sc_PGC1      ----- [ 480]
#At1g66980    RTYGSIILSNL SFVKTFFASGI LVPKSYILPL DDKQYLLPHT SLVQDAHKAG .LYASGF.N D.DIAYNYSW D.--VSEY.. [ 480]
#At3g20520    QSYGSLAKNL SYIRTFSSGI LVPKSYIWPV DSALYLQPHS SLVTDHAKEG .QVFASEF.N DFVIAYNYSY D.--TAEY.. [ 480]
#At5g58050    KKYSEIQQNL AAIKAFASGV LVPKDYIWPI DSAKYLKPAT TFWADAHKAG .EVYASGF.N DLRTSFNYSY D.--SAEY.Q [ 480]
#At5g43300    ----- [ 480]
#At5g58170    KKYSEIQQNL AAIKAFASGV LVPKDYIWPI DSAKYLKPAT TFWADAHKAG .EVYASGF.N DLRTSFNYSY D.--SAEY.Q [ 480]
#Gg_GDE2      HWLHKIGLMT TLITTVVT-- -MSSIAQLWD DEWEMVFISL QATAPFLHIG ALAAVTALSW LIAGQFARME KA--TSQM.M [ 480]
#Mm_GDE3      HSLHKVLLLL IVLVAAG-- -LVGLDIQWR QEWHSLRSL QATAPFLHIG AVAGITLL.W P.A.TFYRIH PR--GPKV.L [ 480]
#Gm17g08680   ----- --MASLPSF A.--FVFL.L [ 480]
#Os03g40670   ----- --MAFWL. SI--IVLV.L [ 480]
#Stc_glpQ1    -----MGTQ ESDERAGGTT GR--RALLGA [ 480]

```

```

#Stc_glpQ2 -----MH [ 480]
#At5g41080 -----R-----TV L...V...LPD SV--YGLSEG [ 480]
#At3g02040 -----S .....I ...EV...L.H F.--.NFS.I [ 480]
#At1g71340 -----MA IFEWRHRRRP FDGGGTRRRR FF.PLY.RNF KR---.ILFA [ 480]
#Hs_GDE1/Mir16 -----W.WEDQGGLLG PF.FLLLVLL LVTRSPVNA [ 480]
#Os02g31030 -----DV LAAGA.ATSA IL--AEVDAA [ 480]
#At1g74210 -----M.LTRCL PL--IWLS.L [ 480]
#At5g55480 QTYGSLAGNL TFLKTFASGV LVPKSYIWPI ES-QYLLPRT SFVQDAHKAG .EVYASGFGN DFDLAYNYSF D.--LAEY.. [ 480]
#Sb03g035370 -----MR...LYC A.--LFLLL.L [ 480]
#At4g26690 RTYGSILSNL TFKVTFASGI LVPKSYILPL DDQYLLPHT SLVQDAHKAG .EVFVSGF.N DIDIADHYSF D.--VSEY.. [ 480]
#At5g08030 -----MAPKYLL PL--LILLS.L [ 480]
#Sb04g021010 -----LKAARVADV PTL.VVAPGL.V--.AGTA. [ 480]
#La_GPX-PDE1 -----M S..MAS.TSF AS--LVFM.L [ 480]
#At1g66970 RTYGSILSNL TFKVTFASGI LVPKSYILPL DDEQYLVPH SLVQDAHKAG .QVYVSGF.N D.DIAYNYSS D.--VSEY.. [ 480]

#La_GPX-PDE2 LHSTPFSNGV K-----FKVP EFVVIHGRGY G-----M NALQSLDRRM KAIKENSIMS FNAAANFPIH FIEF-DVQVT [ 560]
#Gm19g27060 .C.S.R.P..L EMCRSGLLEI. K.....N ----- .V...S.... R....T... ..T..LD ..... [ 560]
#Sc_GDE1 VLGAHPKTE VLLQSLDPNV KLKSSSLHL ATEWNNYPLL HV.L.SK.FD INYQD.ELHE TPLYLACRLN .F.AAVCLLY [ 560]
#Ec_glpQ KLTLKLSMA IMMSTIVMGS SAMAADSN-- -----E KIVIAHRGAS GYLP.HTLPA KAM.YAQGAD YL.Q-.LVM. [ 560]
#Ec_ugpQ -----MSNWP-----Y PRIVAHRGGG .LAP..TLAA IDIG.KYGHK M...-AKLS [ 560]
#Sc_PGC1 -----VEIVGHRAFK ARYP..TLA .EK.YAAGAD V..T..L.M. [ 560]
#At1g66980 FVDNGNFSVD GMLSDFPPLTA SAS.DCFSHI .-RNATKQVD FLVI.KNGAS GEYPGCTKLA YEK.IKDGSD V.DC-P..MS [ 560]
#At3g20520 FIDNGNFSVD GFLSDFPVT. YRAINCFSHV DPKRAKEQAK ITII.KNGAS GDFPGCTDLA YQR..SDGAD ILDC-N..MS [ 560]
#At5g58050 FVDNGQFSVD GVITDFPPTA QSITCFESHQ N-GNLPKAGH ALVITHNGAS GDYPGCTDLA YQK.IDDGAD I.DC-S..MS [ 560]
#At5g43300 -----M....F ----- .M...P.EK. .F....LL. .V..D...D ..... [ 560]
#At5g58170 FVDNGQFSVD GVITDFPPTA QSITCFESHQ N-GNLPKAGH ALVITHNGAS GDYPGCTDLA YQK.VDDGAD V.DC-S..MS [ 560]
#Gg_GDE2 VTAYLAVVVA LYLVP-LTIS SPCIMEKKAL .-----PK P.IIGHRGAP MLAP..TL...QK.VEQK.Y GVQA-.ILS [ 560]
#Mm_GDE3 .LLFFGVTL. IYLMPLLFIS SPCIMKL.DL P-----PK PG.VGHRGAP MLAP..TL..LRKT.ECGAA VF.T-.M.S [ 560]
#Gm17g08680 VIGSNARTLY PLPSKGGNGS RKPLQTF.-- ----- PYNIAHRGSN GELP.ETRPA YLR.IEBEGAD ...T..LSS [ 560]
#Os03g40670 SGESNANPAA SQQSQLDVNH RKPLQTF.-- ----- PYNIAHRGSN GE.P.ETTAA YLR.IEBEGAD ...S-.ILA. [ 560]
#Stc_glpQ1 AVLGAGGAVL GLPGTARAAG TRHGG..G.G V---GSLPV PTVIGHRGAS GYRP.HTFG. YEL.LDLGAD IV.AG.LVP. [ 560]
#Stc_glpQ2 VRAVAVTTTA LLGVALTAPL SHARADEA.D D-----G PTVVAHRGAS GYAP..TLAA VDR..ELG.R WV.N...R. [ 560]
#At5g41080 .ELSKPTS-- -----RL. G.S.....I ----- .V...S...A RGV....L. .S..KY..D ..... [ 560]
#At3g02040 CS.RKAN.-- -----K...V...H ----- .MS..P.L.F S.L....L. ....SK..LD ..... [ 560]
#At1g71340 VIFLAIFFPL YHFHKLRRIR QI.AQKCDWL H-----HP PLVCAHGGDS TLAFP.TMDA YSF.IRSRVD C..V..SRS [ 560]
#Hs_GDE1/Mir16 .LTGSLFVLL RVFSFEPVPS CRALQVLKPR D-----R ISAIHRGGS HDAP..TLAA IRQ..KNGAT GV.L-.IEF. [ 560]
#Os02g31030 GARSAAAG.G G---GGGGQ R.A.....K ----- .A.P....QEV....LR. .E.E.R..VD YV..... [ 560]
#At1g74210 TVCAAGRTHL PLPVKGP.TV KLQLQTS.-- ----- PYNIAHRGSN GE.P.ETTAA YLK.IEBEGTD ...T-.ILSS [ 560]
#At5g55480 FMDNGDFSVD GLSDFPPLTA SSA.DCFSHL .-SNASSQVD FLVI.KNGAS GDYPGCTDLA YTK.IKDGAD V.DC-SL.MS [ 560]
#Sb03g035370 ..LAFARPLF PLPSKTKYEE KKPIQTF.-- ----- PYNIAHRGSN GE.P.ETAAA YLR.IEBEGAD ...S-.ILAS [ 560]
#At4g26690 FVDNGNFSVD GVLSDFPITA SASLDCFSHV .-RNATKQVD FLVITK.GAS GDYPGCTDLA YKK.IKDGAD V.DC-S..LS [ 560]
#At5g08030 VANCASRPLY RLPSEAKHAT KKPLQTS.-- ----- PYNLAHRGSN GELP.ETAPA YMR.IEBEGAD ...T-.ILSS [ 560]
#Sb04g021010 VATMVK.G.G G---GGGGG R.S.....K ----- .A.A.P..QEV..TVR..D..R..VD YV..... [ 560]
#La_GPX-PDE1 IIGCTAIPVY PIHRHVQHS RKPLQTF.-- ----- PYNIAHRGSN GELP.ETAPA YLR.IEBEGAD ...T-.ILSS [ 560]
#At1g66970 FVDNGDFSVD GVLSDFPITA SAA.DCFSHI .-RNATKQVD FLVI.K.GAS GDYPGCTDLA YEK.IKDGAD V.DC-S..MS [ 560]

```

```

#La_GPX-PDE2  NDDCPVIFHD DFILSQENGV VFEKRITELS -LSEFLAYGP QRECGKDGKV -LVRKTKDGK IVQWE----- [ 640]
#Gm19g27060  R.....L..TE..T..G.....-.....S...DE.E.N..L...M..D----- [ 640]
#Sc_GDE1      .GADLE.REK L.GWTAIFVA AA.GFTDIVK -.LIANNANF DI.DEGGWTP -MEHAVLR.H LHIADMVQIR DELVTHPHSQ [ 640]
#Ec_glpQ     K..HL.VL..HYLDRVTDVA DRFPDRARKD GRYYAIDFTL DEIKSLKfte GFDIENGKkV QTYPG-----RFPMG--- [ 640]
#Ec_ugpQ     K.GEIFLL..NLERTS..W GVAGELNWQD -----L L.VDAGSWYS ----.AFK.- ----- [ 640]
#Sc_PGC1     S.GMV.VN..SDTGRMWDKN LVIGES.WEE -VKRLRCKED GSLAMMTL.E I.TWAVCHPG AKLMLD----- [ 640]
#At1g66980   S.GI.FCSSS IDLVNSTTVG QTH-LRNRSI -IVPEIS-SV AGIFTFSLTW -HEIQSLTPA .SNPF-RENG MSRNPN---- [ 640]
#At3g20520   K.KI.PCMSS FDLINST.VI ETS-FRNL.S -VVSEINPRR SGIYTFSLTM -SQIQ.LKPT .SNL.-KDSG LFRNPR---- [ 640]
#At5g58050   K.GIAFCHDA ADLSAST-TA RTT-FMSRAT -SVPEIQ-PT NGIFSF.LTW -AEIQSVKPKQ .ENPF-TATG FQRNPA---- [ 640]
#At5g43300   R.G.....I.MFT..Q..II...V..MD-.H...S...D-.TNV.P-MW.....R.FE.K----- [ 640]
#At5g58170   K.GIAFCHDA ADLTAST-TA MTI-FMSRAT -SVPEIQ-PT NGIFSF.LTW -AEIQSVKPKQ .ENPF-TATG FQRNPA---- [ 640]
#Gg_GDE2     Y.GV.FLM..KTLRRTT.VE EVFPGRAYEH -S.M.NWTDL EMLNAGEWFL -RNDPFWTAG SLSRS-----DYL---- [ 640]
#Mm_GDE3     S.GV.FLM..ERLSRTT.VA SVFPERISAH -S.D.SWAEL..LNAGTWFL -ERQPFWGA. KLSGS-----DRK---- [ 640]
#Gm17g08680  K.GVLIC...VTLDDTTDIA NHTGFANRKR -TY.VQGIMN TGFFPV.FTL -KEL.SLRV. QRYSP-----RDQQ---- [ 640]
#Os03g40670  K.GHLIC...VILDATTDIA NRTEFANRKR -TY.VERQNV TGWFVV.FTL -EEL.SLRV. QRYNF-----RDQQ---- [ 640]
#Stc_glpQ1   K.GHL.CR.E PE.GGTTDVA DHREFADRKR -TKLLDGVST TGWFTE.FTL -AEL..LRAT ERIPA-----NRPHT-- [ 640]
#Stc_glpQ2   R.GEL.VL..ESLARTT DVE EVFPDRSPWK -VKD.T.AEI A.LDAGSWFG -SEYAG----- [ 640]
#At5g41080   K.....Y.E..I.N.S.V.D..L...K.TE.I..T-.M..S.E..VLK.D----- [ 640]
#At3g02040   R.G..I....Y.E.Q..Y...V..VC-...MS...DT..T..P-.L..S.E..HK.S----- [ 640]
#At1g71340   S.GVLFAL.N RDLQRIARNS SVQVGDLSMK QIK.LDVSEI VKGTLGS--- [ 640]
#Hs_GDE1/Mir16 S.GI..LM..NTVDRTTD.T GRLCDL.FEQ --IRK.NPAA NHRLRN.FPD ----- [ 640]
#Os02g31030  K.G.....N..FTK.D.K ILD..V.D.Q-.ED..L...N.Q..G..P-.L..L...N.N----- [ 640]
#At1g74210   K.GVLIC...CILDETT.VA SHKEFADRKR -TYDVQGFNI TGFFTF.FTL -KEL.QLRI. QRYAF-----RDQQ---- [ 640]
#At5g55480   S.GI.FCLSS INLGEST.V. QSP-FRNRST -TVPEIG-SL PGIYSFSLAW -SEIQ.LRPA .ENPYSREFT MFRNPR---- [ 640]
#Sb03g035370 K.GTLIC...VTLDDTTDVA RRKEFANRRR -TY.VEFVNV SGWFVV.FTL -EEL..LKV. QRYSP-----RDQK---- [ 640]
#At4g26690   S.GT.FCLSS IDLGNSTTVS LTA-FRNRST -TVPE.G-SL GAIYTFSLTW -AEIQ.LTPA .SNPY-RVTS LFRNPK---- [ 640]
#At5g08030   K.GVLICH..VNLDTTDVA DHKEFADRKR -TY.VQGMN TGFFTV.FTL -KEL..LGA. QRYPF-----RDQQ---- [ 640]
#Sb04g021010 K.G..I....N..FT..D.K ISQ..V.DIH-.ED..Q...N.Q..V..P-.L.RL...R.M.N.N----- [ 640]
#La_GPX-PDE1  K.GVLIC...VTLDDTTDVA NHQEFANRKR -TY.VQGENV TGFFTV.FTL -KEL.SLRV. QRYNF-----RDQQ---- [ 640]
#At1g66970   S.GV.FCLRS IDLRNSIAAL QNT-FSNRST -SVPEIS-SV PGIFTFSLTW -PEIQSLTPA .SNPF-RVYR IFRNPR---- [ 640]

#La_GPX-PDE2  ----VEQDDS LCTLEEAFLN VE-PSLGFN- -----IELKF DDHIVYHQ-- --DYLSHVLQ [ 720]
#Gm19g27060  ----.....P....Q...VK...T.....E...V.... [ 720]
#Sc_GDE1     LNSGS.EKEP .NEISAGE..ERNENGNNGN KGS LGKLAGP IKS YGHRFLD NNE.SL.LITL GSNDTRNKSP SISLS.EA.A [ 720]
#Ec_glpQ     ----KS.FR VH.F..EIEF .QGLNHSTGK NIG-----YPEI KAPWFH...--EGKDIAA [ 720]
#Ec_ugpQ     -----EP.PL.SQVAER CRKHGMMMA.- ----- [ 720]
#Sc_PGC1     ---IKPTNEK IIMIKTFVIM L.VKNDLKFW QER-----TWGL WLLDW.DFGI ETGV.KDFKV [ 720]
#At1g66980   ---ERNSGN .IS.Y.FLNL AKNSTSLSG-----LISL ENVVYLRE-- --KKGLD.VK [ 720]
#At3g20520   ---NNKAGK FL..S.FLFL PNRY.SLLG-----LLIEV ENAAYLVE-- --HQGIS.VD [ 720]
#At5g58050   ---NKNAGK FT..ADFLLEL GK-AKAVTG-----VLINI QNAAYLAS-- --KKGLG.VD [ 720]
#At5g43300   ---.K..P....D....K-H.....NT..GE-- --GE.RQT.D [ 720]
#At5g58170   ---NKNAGK FI..ADFLDF SK-AKAVTG-----VMINI ENAAYLAS-- --KKGLG.VD [ 720]
#Gg_GDE2     ---EAANQ. V.K.ADML-E .IKDNTSLIL N-----FQDLP P..PY.TS-- --YIN [ 720]
#Mm_GDE3     ---EAENQT IPA...LLKE AAALN.SIMF D-----LRRPP RN.TY.DT-- --FVN [ 720]

```

#Gm17g08680 ---FNGKFQ II.F.FITI AQDAPRVVG----- .YPEI KNPVFIN.QV KWSHGKRFED [ 720]  
#Os03g40670 ---YNGKYQ II.FD.YI.I ALYADRVVG----- .YPEL KNP.FINEHV KWSGKGFED [ 720]  
#Stc\_glpQ1 ---LYDGRWE IP.F.VLRW QNEQTRRRGK QV-----W.YPEL KHPTYFRKLG LG-----TEE [ 720]  
#Stc\_glpQ2 -----AR VP...QYVHR ..HNHQKLL----- .EL KSPGL.PG-----IE. [ 720]  
#At5g41080 ---.DL...EQ...EQ...QT...----- .QT...ER-- --EF.V.I.R [ 720]  
#At3g02040 ---.AT...F...Q...EK..N.N...----- .L..NVF.SS-- --H..RL.L [ 720]  
#At1g71340 -----SR IP...LAL ISNSVRKVI-----LDA.V GPPMYEKG-----LA. [ 720]  
#Hs\_GDE1/Mir16 -----EK IP..R..VAE CLNHN.TIF-----FDV KG.AHKAT-- -----E [ 720]  
#Os02g31030 ---.QS..P...Q...EK..N..R...----- .NLE.QE-- --EE.TCI.. [ 720]  
#At1g74210 ---YNGMYP II.F..FLTI ARDAPRVVG----- .YPEI KNPVLMN.HV KWPGGKGFED [ 720]  
#At5g55480 ---ERSSGK FVS.SDFLNL AKNS.SLTG-----VLISV ENATYLRE-- --KQGLDAVK [ 720]  
#Sb03g035370 ---YNGMF. II.F..FISI ALDADRTVG----- .YPEI K.PVPINKHV KWADGKGFED [ 720]  
#At4g26690 ---QKNAGK .FS.SDFLSL AKNSTLSG-----VLISV ENAAYLRE-- --EQGLD.VK [ 720]  
#At5g08030 ---YNGKFP II.FD.YISI ALDAPRVVG----- .YPEI KNPVFMN.QV KWADGKGFED [ 720]  
#Sb04g021010 ---.QSE.A.....EK..N-TR....-----V....SLE.QE-- --EE.TRI.. [ 720]  
#La\_GPX-PDE1 ---YNGKFQ II.F..YISI ALEAPRVVG----- .YPEI KNP.LIN.HV KWADGKGFED [ 720]  
#At1g66970 ---EKNSGK .IS.SQFLDL AKTYTSLSG-----VLISV ENAAYLRE-- --KQGLD.V. [ 720]  
  
#La\_GPX-PDE2 AILKVVFDNA ----- KNRPIIFSTF QPDAASLVKK LQSTYPVFFL TNGGCEIYED KRR----- [ 800]  
#Gm19g27060 T.....Y.----- .D.....M.IR..TN.....V..... [ 800]  
#Sc\_GDE1 KVIGLET.C. LSLVISCNDS IDKSSVILD PL.DNVDAVD FKVPFK.DYS HTLYFD.VPT YGTR-----SLETHN [ 800]  
#Ec\_glpQ KT.E.LKKYG -----YTG .DDKVYLQC. DA.ELKRI.N VLEPKMGMD. NLVQLIA.T. WNETQKQPD GSWVNYNDW [ 800]  
#Ec\_ugpQ --IEIKPTTG -----TG.LTGK.V ALA.RE.WTG MTPP---L. SSFEIDAL.A AQQ----- [ 800]  
#Sc\_PGC1 IVISLSL.I. SQFVKRSLTL NDPHYKLFGI SVHFV.SWTS QFRLRLLPV. MKNDIKV.LW TVN----- [ 800]  
#At1g66980 VV.NRLTETG ----YIVG- -TLKVMIQST TRLVLVDF.N QSTY---KTV YKIKET.GNI TDS----- [ 800]  
#At3g20520 .V.DELKRAT T---QONKT SA.T.LIQST DKSVMKPF.E KNKMNHDELV YRVDDN.RDV ADS----- [ 800]  
#At5g58050 VVKSALTNST -----LDKQ STQKVLIQSD DSSVL.SFEA VPPY---TRV LSIDK..GDA PKT----- [ 800]  
#At5g43300 N..T..NEHS -----S.H...R.IRN M.RC.....K.V..... [ 800]  
#At5g58170 .VKSALAKST -----LDKQ STQKVLIQSD DSSVLASFEA VPPY---TRV LSIDK..GGA PKP----- [ 800]  
#Gg\_GDE2 IT..TILASG IQQQAVMWLP DTERQLVRQI A.AFQQTSLG KLDARLREK GIVKLNLYT .VT----- [ 800]  
#Mm\_GDE3 QT.EA.LSAN VSQAMVWLP DEDRANVQR A.RMRQIYGH QGGNTERPQ ---FLNLPYQ DLP----- [ 800]  
#Gm17g08680 KFVETLKKYG YKGSYLSKDW LRQ.LFIQS. A.TSLYISN KTDLPKI.LI DDVIVPTQDT NQS-----FWE [ 800]  
#Os03g40670 KFVQTLKKYG YKGSYLSKDW LRQ.LFIQS. A.SSLIYMSN MTNSPKI.LI DDTTVRTQDT NQS-----YYE [ 800]  
#Stc\_glpQ1 RLARLLRKYG -----KDR..S.V.IQS. E.TSIQRMN. .VGNPLAVL. SGANSRPWDF VETGD-----PRTTAD [ 800]  
#Stc\_glpQ2 QT...LANEG ---WLDLRRH VAGRLVVS. DA.SIRT.HD .KPAVKTG.. GTPAVSELP- ----- [ 800]  
#At5g41080 SV.Q..SNY. ----- .D..V...S. ....K..RE .....DA.N..HN. E..... [ 800]  
#At3g02040 P..Q..S.IG -----ND.T...S.H...L..R..T.....T.M.H.T..... [ 800]  
#At1g71340 D..SIIERAQ -----C.NC.VWAKS DTL.RDIIRR APD.MVGYIV MVDPLTGARN ----- [ 800]  
#Hs\_GDE1/Mir16 .LK.MYMEFP -----Q LYNNSVCS. L.EVIYKMRQ TDRDVITALT HRPWSLSHTG DGK----- [ 800]  
#Os02g31030 .....EY. ----- .D.....S. ....QVMR. ....Y...T...A.V..... [ 800]  
#At1g74210 KVVETLKKYG YKGSYLSKDW LKQ.LFIQS. A.TSLYISN .TDSPK.LLI DDVTMPTQDT NQT-----YAE [ 800]  
#At5g55480 .V.DILTQAG ----YSNKT TTTRVMIQST NSSVLIDF.. QSRY---ETV YKVEET.RDI LDT----- [ 800]  
#Sb03g035370 KFDVTLKKYG YKGSYLSKDW LKQ.LFIQS. A.TSIVH.SD .IDSPK..LI DDITVRTQDT NQS-----YWE [ 800]  
#At4g26690 .V.DILTQAG ----YSN-S TATKVMIQST NSSVLVDF.. QSQY---ETV YKVEEN.RDI LDS----- [ 800]  
#At5g08030 KFVETLKKYG YKGSYLSKDW LKQ..FIQS. AATSLYISN MTDSPKL.LI DDVTILTQDT NKT-----YAE [ 800]

```

#Sb04g021010 . . . . . I . E H . . . . . D . . . . . L . . . . . S . . . . . Q . M R . . . . . G . . . . . Y . . . . . T . L . T . V . . . . . [ 800 ]
#La_GPX-PDE1 K F V E T L K K Y G Y K G S Y L S K D W L K Q . A F I Q S . A . T S L V Y T S N Q T D L P K I L L I D D I T I P T Q D T N Q S - - - - - Y W E [ 800 ]
#At1g66970 . V . D I L T E A G - - - - - Y S N G T T T T K V M I Q S T N S S V L V D F . . Q S K Y - - - - - E T V Y K I E E T . G N I R D S - - - - - [ 800 ]

#La_GPX-PDE2 - - - - - N S L E E A L K L C L E N G L Q G - I V S E I - - - - - K G V F R N P A I V T K I K E S E L S L L T Y G S L N N V P E A V Y M Q H L M G I D G V I V D L V Q [ 880 ]
#Gm19g27060 - - - - - . . . . . M . . . . . E . . . . . - - - - - . I . . . . . G A . . Q . . . . . K . . . . . S . . K . . . . . . . . . . . N . . . . . [ 880 ]
#Sc_GDE1 R I D C Q K N N N N Y M A R G V S M L N K S Y . S V G V N R S I L N G S V T . P I . A N H T . E I . G T L K F E Y I I I T P F E H P Q L P L E R T E T Y W K S [ 880 ]
#Ec_glpQ M F K P G A M K Q V A E Y A D G I . P D Y H M L I . E - - - T S Q P G . I K L T G M V Q D A Q Q N K . V V H P Y T V R S D K - - - L P E Y T T . V N Q L Y D A L [ 880 ]
#Ec_ugpQ - - - - - A . P E . P R G L L . D E W R D D W R - - - - - E L T . R L G C V S I H L N H K . L D K A R V M Q L K D A G L R I . V Y T V N K P Q R A A E [ 880 ]
#Sc_PGC1 - - K P I D F K Y L C E . P I H G A I T D D I K A R - - - - - K L C D G H . V A . K P T A E K K F V A P S L A S V D G L R F H F A I K V Y N I L C T . L Y [ 880 ]
#At1g66980 - - - - - A I . D I K . F A N A V V I N K A S . F P N - - - - - S D S . L T G Q T N V L E R L Q K F Q . P V Y V E L F Q N . F . S Q P D F F A . E T V E I N A Y [ 880 ]
#At3g20520 - - - - - A I K D I K N F A G S I V I S K K S . F P Y - - - . F I I L E K E T N I A S K L K S N G . R V Y V E R F S N . C . T H A F D F Y D . P T L E I D S F [ 880 ]
#At5g58050 - - - - - . I . . . I K . H A D A V N . L R T S L I T V - - - - - S Q S . A T G K T - N V V E . M H K A N I S V Y V S V L R N . Y I A I A F D Y F S . P T . E L A T F [ 880 ]
#At5g43300 - - - - - . . . . . D . . . . . I . . . . . K . S . . . . . - L . . . . . V - - - . A I L . T . N A I . R V . D . K . . . . . S . . . . . Q . . . . . V . V I . L . Y . . . . . V E . . . . . M . K [ 880 ]
#At5g58170 - - - - - . V D . I K . Y A E A V N . L R T S L V T V - - - - - S Q S . T T G K T - N V V E . M H K G N I S V Y V S V L R N . Y I S V A F D Y F S . P T . E L A T F [ 880 ]
#Gg_GDE2 - - N E D V R D Y M A A N . S V N . Y T V N E P W L - - - - - Y S I L W C T G V P S V T S D . S H V . R K V P F P I W L M P P D E Y R L I W I T S D L . S F I I I [ 880 ]
#Mm_GDE3 - - A L D I K A L H Q D N I S V N . F V V N K P W L - - - - - F S L L W C A G V D S V T T N A C Q L . Q Q M Q N P L W L L P P Q K Y L M I W V . T D C A S I . L L [ 880 ]
#Gm17g08680 I T S D E Y . D Y I K Q Y V V G I . P W K D T . V P V - - - - - V E N - Y M T N P T N L V A R A H A H N . Q V H P Y T Y R N . F P F L H F N F S Q . P Y M E Y D Y W [ 880 ]
#Os03g40670 I T S D A Y . A F I R . Y I V G I . P W K D T I V P P - - - - - I N N - Y L G P P T D L V A R A H A L N . Q V H P Y T F R N . N M F L H F D F H Q . P Y L E Y E Y W [ 880 ]
#Stc_glpQ1 L V T P E G . K . I A S Y A Q G I . P T L D L I V P K - - - - - D S A G . L T E P T . L V R D A H R A G . I L H P Y T M R N . N P F L P A E F R Q G - - - - - [ 880 ]
#Stc_glpQ2 - - - - - A Y A E F A D Q I N F S Y G S L . M S - - - - - Y V S . V H A F T G P H G R P . E V L T W T V . D A D T A R R V A G Y D V . . I . T N K P D [ 880 ]
#At5g41080 - - - - - . . . . . I Q V . . . . . G . . . . . - . . . . . V - - - . . . . . A I S . . . . . N . . . . . K . . . . . G . . . . . Y V . . . . . F . E [ 880 ]
#At3g02040 - - - - - . . . . . I . V . . . . . G . . . . . - . . . . . V - - - . . . . . L . N . . . . . K . . . . . M . . . . . K . . . . . A . . . . . . . . . . . E . . . . . H . E [ 880 ]
#At1g71340 - - - - - S . L R M K . A R V V G . Y H P - - - - - L I D E E L V R V V R R R N K E V . A W T V D D A D P M K R M L H L . V . A . V T S D P S [ 880 ]
#Hs_GDE1/Mir16 - - - - - P R Y D T F W K H F I F V M M D I L L D W S M H N I L W Y L C G I S A F L M Q K D F V S P A Y L K K W S A K G - I Q V V G W T V N T F D E K S Y Y [ 880 ]
#Os02g31030 - - - - - . . . . . I . . . . . A S . M . . . . . A - - - - - R . I . . . . . H . . . . . A . P . . . . . A N . . . . . T . . . . . . . . . . . V N . . . . . [ 880 ]
#At1g74210 I T S D A Y F . Y I K Q Y V V G I . P W K D T I V P V - - - - - N N N - Y V L . P T D L V . R A H A H N . Q V H P Y T Y R N . H E F L H Y N F S Q . P Y K E Y D Y W [ 880 ]
#At5g55480 - - - - - A I . D I K . F A D A V V I S K K S . F P T - - - - - S E S . T T G Q T - K L V E R L Q K F Q . P V Y V E V F R N . F . S Q P W D F F A . A T V E I N S H [ 880 ]
#Sb03g035370 I T S D D Y . A Y I G . Y V V G L . P W K D T I V P A - - - - - S . N - Y L M P P S D L V A R A H A H N . Q V H P Y T Y R N . N Q F L H F N F H Q . P Y T E Y D F W [ 880 ]
#At4g26690 - - - - - A I . D I K . F A D A V V I . K L S . F P V - - - - - A Q S . I T T Q T - N V V E K L Q K . Q . P V Y V E L F Q N . F L S Q P Y D F F A . A T V E I N S Y [ 880 ]
#At5g08030 I T S D A Y . D Y I K P Y V I G I . P W K D T I V P V - - - - - N N N - . L M T P T D L V A R A H S R N . Q V H P Y T Y R N . N Q F L H L E F N Q . P Y L E Y D Y W [ 880 ]
#Sb04g021010 - - - - - . . . . . V . . . . . A S . M . . . . . A - - - - - R . I . . . . . H . . . . . A . P . . . . . A N . . . . . T . . . . . . . . . . . V N . . . . . P [ 880 ]
#La_GPX-PDE1 I T S D S Y F . Y I K D Y V V G I . P W K E T . V T V - - - - - V N N - Y L Q T P S D L V . R A H A H N . Q V H T Y T Y R N . N K F L C F N F N Q . P Y Q E Y D Y W [ 880 ]
#At1g66970 - - - - - A I . D I K . F A N A V V I N K D S . F P N - - - - - S D S . L T G Q T - N V V E R L Q K . Q . P V Y V E L F R N . F . S Q A Y D F F S . A T V E I N A Y [ 880 ]

#La_GPX-PDE2 E I T E A V T N L I T S A K V V V D E E G L N E - - - - - K L K L H S K P K F S Q L E L S [ 960 ]
#Gm19g27060 . . . . . A D M . K P T . G G E G . - . . . . A . G C G - - - - - V Q G N . . . . . Q . . . . . [ 960 ]
#Sc_GDE1 L V S T R . I G H R G L G . N N P N K S L Q I G E N T V E S F I M A A S L G A S Y V E F D V Q L T K D N V P V V Y H D F L V A E T G V D I P M H E L T L E Q F L [ 960 ]
#Ec_glpQ Y N K A G . N G . F . D F P D K A V K F L N K . - - - - - [ 960 ]
#Ec_ugpQ L L R W G . D C I C . D . I D . I G P N F T A Q - - - - - [ 960 ]
#Sc_PGC1 S K W V H I K L C G W . I A Y . I F L F L R T I H F L - - - - - [ 960 ]
#At1g66980 I F G A G I N G T . . E F P Y T A A R Y K R . R C L G R - - - - - E E V P P Y M L P V N P G G V L T L I S T S S L P P A Q D P N P I F T H D D V T E P P . P [ 960 ]
#At3g20520 V R D V Q I D G I . . D F P A T T A R Y R K . K C Y G - - - - - E F G L T T T G E L I T F A N P M L L P P A E A P Y P A L L D S D V T E P P . P [ 960 ]
#At5g58050 I A G R G . D G V . . E F P A T A T R Y L R S P C S D L N - - - - - K D Q P Y A I L P A D A G A L L T V A D K E A Q L P A I P N P P L D A K D V I D P P . P [ 960 ]
#At5g43300 D . S . . I A . I E V T N E D D C E G . D E R K C L I R - - - - - F G E E R K . V E I T K D M I T [ 960 ]

```

```

#At5g58170   ISGSG.DGV. .EFPATATRY LKSPCSDLN- ----KEQPY AILPAEAGGL VVVADKEAQP PASAPNPPLE AKDVIDPP.P [ 960]
#Gg_GDE2     VGVFIFQ.YH NDQWRLGSIR TY.PEQIM-- -----L SAAVRRSSRD VKIMKEKLIF [ 960]
#Mm_GDE3     LSIFLLRGGC AKRNRG--- ----- ---LETAV.L [ 960]
#Gm17g08680  INKIG.DG.F .DFTGSLHRY QEWTSN---- -----HKD DDDK---N.L [ 960]
#Os03g40670  LGEIG.DG.F .DFTGTLHRF QECTTP-----Y P .NEKNAEA.L [ 960]
#Stc_glpQ1   ---SDPDAY GDVFGAFRTY FATGIDG--- -----V FTDNPDITGVL [ 960]
#Stc_glpQ2   VVRD..D--- ----- [ 960]
#At5g41080   ..I.ST.RMM IRPPSSSPL PSPSK-D--- -----DDVAIT R.E..K.I. [ 960]
#At3g02040   .....REMM KPSNRDA.G- -----TKP ..N..DR... [ 960]
#At1g71340   MFQQLMED.R .ECLEEGFSI RT----- [ 960]
#Hs_GDE1/Mir16 .SHLGSSYIT D.MVEDCEPH F----- [ 960]
#Os02g31030  .....SE.. .VPEPLNAD N.SNG-----AA.DAA T.H...C.I. [ 960]
#At1g74210   INEIG.DG.F .DFTGSLHNF QEWTSP-----LP DTSK.PRQ.L [ 960]
#At5g55480   VTGAGINGT. .EFPFTAARY KR.SCLTR-- ----KDVPP YMIPVQPAGL LTIIVSPASLP PAEAPSPVFT DADVTEPP.P [ 960]
#Sb03g035370  IN.VG.DG.F .DFTGTLHRY QELTSP----- .P .DE-TANS.L [ 960]
#At4g26690   ITGAGINGT. .EFPFTAARY KR.LCLGR-- ----KETIP YMAPAQPGAL LTLVSPATAFP PAEAPNPVFT DADVTEPP.P [ 960]
#At5g08030   LNKIG.DG.F .DFTGSLHNY QELKSP-----LP QQQ----- [ 960]
#Sb04g021010  ...D..SE.. ALPEPDEVD N.SNQ-----AARGAT T.N...R.I. [ 960]
#La_GPX-PDE1  VKKIG.DG.F .DFTGSLHKY QEWTSSNR-- -----HNE SDDKTASR.L [ 960]
#At1g66970   IYGAGINGT. .EFPFTAARY KR.RCLGR-- ----EEVPP YMLPVNPGGL LNVMSPLSLP PAQAPNQDFI EADVTEPP.. [ 960]

#La_GPX-PDE2  FLLKLIPQLI QI----- [1040]
#Gm19g27060  ..F.....L .. [1040]
#Sc_GDE1     D.NNADKEH. .RGAGHSPHH VNGADTALQK YGRSRVDDSD VSTLRRAWDL HDNDPNGKSN NAHWSDNRMR LTKTFKKNF [1040]
#Ec_glpQ     ----- [1040]
#Ec_ugpQ     ----- [1040]
#Sc_PGC1     ----- [1040]
#At1g66980   PVIAKS.TST LGTPSTIAKP LISWSVAGVV LFLVLLTLVF CFHRKRETRL RQQLKALIP LEHYTYAQVK RITKSFAEVV [1040]
#At3g20520   EARSQP.ASS PSKAEKAIE VP----FAF IAMAILVCF ISV----- [1040]
#At5g58050   PVA..AS-NG TEGGPPQTPP RSGTVAIAAN LSLSLAMMA LGLLYTA-- [1040]
#At5g43300   L.N.FV.K.L ----- [1040]
#At5g58170   PVAN.AASNA TGAQSHPPP ASGTVANAAN LGLSLLAMLA LGV----- [1040]
#Gg_GDE2     SEINNGVETT DELSLCSENG YANEMVTPTD HRDTRLRMM- ----- [1040]
#Mm_GDE3     TKINN----- FASE----- [1040]
#Gm17g08680  HKIA.LVSSY E----- [1040]
#Os03g40670  QKINYMLKD- SGY----- [1040]
#Stc_glpQ1   AREDFVNG-- ----- [1040]
#Stc_glpQ2   ----- [1040]
#At5g41080   ....LS... .H----- [1040]
#At3g02040   .....E.. .H----- [1040]
#At1g71340   ----- [1040]
#Hs_GDE1/Mir16 ----- [1040]
#Os02g31030  ...R...E.V .. [1040]
#At1g74210   SQIASLVLPY AKA----- [1040]
#At5g55480   PVSARA.TTT PGQSTGEKS PN---GQTR VALSLLLSAF ATVFAS-----LLL L----- [1040]

```

|                |                                                                                        |        |
|----------------|----------------------------------------------------------------------------------------|--------|
| #Sb03g035370   | VKISQMISAY EGL-----                                                                    | [1040] |
| #At4g26690     | PVTAKA.TSS PGTPTNAQA PS---GQTR ITLSLLLSVF AMVLAS---LLL L-----                          | [1040] |
| #At5g08030     | -----                                                                                  | [1040] |
| #Sb04g021010   | ...R...E.V .-----                                                                      | [1040] |
| #La_GPX-PDE1   | HKIASLVTSY -----                                                                       | [1040] |
| #At1g66970     | PVIAKA.TST PGTPTNAQA PS---GQTR LKLSLLLSVF FLS-----LLL L-----                           | [1040] |
| #La_GPX-PDE2   | -----                                                                                  | [1120] |
| #Gm19g27060    | -----                                                                                  | [1120] |
| #Sc_GDE1       | KGNARGHSIA SSFVTLKELF KKIPANVGFN IECKFPLDE AEEEEELGQIM MEMNHWDTV LKVVDNANG RDIIFFSSFP  | [1120] |
| #Ec_glpQ       | -----                                                                                  | [1120] |
| #Ec_ugpQ       | -----                                                                                  | [1120] |
| #Sc_PGC1       | -----                                                                                  | [1120] |
| #At1g66980     | GRGGFGIVYK GTLSDGRVVA VKVLKDTKGN GEDFINEVAT MSRTSHLNIV SLLGFCSEGS KRAIIEFLE NGSLDKFILG | [1120] |
| #At3g20520     | -----                                                                                  | [1120] |
| #At5g58050     | -----                                                                                  | [1120] |
| #At5g43300     | -----                                                                                  | [1120] |
| #At5g58170     | -----                                                                                  | [1120] |
| #Gg_GDE2       | -----                                                                                  | [1120] |
| #Mm_GDE3       | -----                                                                                  | [1120] |
| #Gm17g08680    | -----                                                                                  | [1120] |
| #Os03g40670    | -----                                                                                  | [1120] |
| #Stc_glpQ1     | -----                                                                                  | [1120] |
| #Stc_glpQ2     | -----                                                                                  | [1120] |
| #At5g41080     | -----                                                                                  | [1120] |
| #At3g02040     | -----                                                                                  | [1120] |
| #At1g71340     | -----                                                                                  | [1120] |
| #Hs_GDE1/Mir16 | -----                                                                                  | [1120] |
| #Os02g31030    | -----                                                                                  | [1120] |
| #At1g74210     | -----                                                                                  | [1120] |
| #At5g55480     | -----                                                                                  | [1120] |
| #Sb03g035370   | -----                                                                                  | [1120] |
| #At4g26690     | -----                                                                                  | [1120] |
| #At5g08030     | -----                                                                                  | [1120] |
| #Sb04g021010   | -----                                                                                  | [1120] |
| #La_GPX-PDE1   | -----                                                                                  | [1120] |
| #At1g66970     | -----                                                                                  | [1120] |
| #La_GPX-PDE2   | -----                                                                                  | [1200] |
| #Gm19g27060    | -----                                                                                  | [1200] |
| #Sc_GDE1       | DICIMLSLKQ PVIPIFLTE GGSEQMADLR ASSLQNGIRF AKKNLLGIV SAAAPILKAP RLVQVKSNG LVCVTYGVDN   | [1200] |
| #Ec_glpQ       | -----                                                                                  | [1200] |
| #Ec_ugpQ       | -----                                                                                  | [1200] |
| #Sc_PGC1       | -----                                                                                  | [1200] |
| #At1g66980     | KTSVNDWTA LYRIALGVAH GLEYLHHSCK TRIVHFDIKP QNVLLDSDFC PKVSDFLAK LCEKESILS MLDTRGTIGY   | [1200] |



|                |                                                                                        |        |
|----------------|----------------------------------------------------------------------------------------|--------|
| #At3g20520     | -----                                                                                  | [1200] |
| #At5g58050     | -----                                                                                  | [1200] |
| #At5g43300     | -----                                                                                  | [1200] |
| #At5g58170     | -----                                                                                  | [1200] |
| #Gg_GDE2       | -----                                                                                  | [1200] |
| #Mm_GDE3       | -----                                                                                  | [1200] |
| #Gm17g08680    | -----                                                                                  | [1200] |
| #Os03g40670    | -----                                                                                  | [1200] |
| #Stc_glpQ1     | -----                                                                                  | [1200] |
| #Stc_glpQ2     | -----                                                                                  | [1200] |
| #At5g41080     | -----                                                                                  | [1200] |
| #At3g02040     | -----                                                                                  | [1200] |
| #At1g71340     | -----                                                                                  | [1200] |
| #Hs_GDE1/Mir16 | -----                                                                                  | [1200] |
| #Os02g31030    | -----                                                                                  | [1200] |
| #At1g74210     | -----                                                                                  | [1200] |
| #At5g55480     | -----                                                                                  | [1200] |
| #Sb03g035370   | -----                                                                                  | [1200] |
| #At4g26690     | -----                                                                                  | [1200] |
| #At5g08030     | -----                                                                                  | [1200] |
| #Sb04g021010   | -----                                                                                  | [1200] |
| #La_GPX-PDE1   | -----                                                                                  | [1200] |
| #At1g66970     | -----                                                                                  | [1200] |
| <br>           |                                                                                        |        |
| #La_GPX-PDE2   | -----                                                                                  | [1280] |
| #Gm19g27060    | -----                                                                                  | [1280] |
| #Sc_GDE1       | NDPENASIQI EAGVDAVIDV SVLAIRRLT KKNEK-----                                             | [1280] |
| #Ec_glpQ       | -----                                                                                  | [1280] |
| #Ec_ugpQ       | -----                                                                                  | [1280] |
| #Sc_PGC1       | -----                                                                                  | [1280] |
| #At1g66980     | IAPEMISRVY GNVSHKSDVY SYGMLVLEII GARNKEKANQ ACASNTSSMY FPEWVYRDLE SCKSGRHIED GINSEDELA | [1280] |
| #At3g20520     | -----                                                                                  | [1280] |
| #At5g58050     | -----                                                                                  | [1280] |
| #At5g43300     | -----                                                                                  | [1280] |
| #At5g58170     | -----                                                                                  | [1280] |
| #Gg_GDE2       | -----                                                                                  | [1280] |
| #Mm_GDE3       | -----                                                                                  | [1280] |
| #Gm17g08680    | -----                                                                                  | [1280] |
| #Os03g40670    | -----                                                                                  | [1280] |
| #Stc_glpQ1     | -----                                                                                  | [1280] |
| #Stc_glpQ2     | -----                                                                                  | [1280] |
| #At5g41080     | -----                                                                                  | [1280] |
| #At3g02040     | -----                                                                                  | [1280] |
| #At1g71340     | -----                                                                                  | [1280] |
| #Hs_GDE1/Mir16 | -----                                                                                  | [1280] |

#Os02g31030 ----- [1280]  
#At1g74210 ----- [1280]  
#At5g55480 ----- [1280]  
#Sb03g035370 ----- [1280]  
#At4g26690 ----- [1280]  
#At5g08030 ----- [1280]  
#Sb04g021010 ----- [1280]  
#La\_GPX-PDE1 ----- [1280]  
#At1g66970 ----- [1280]

#La\_GPX-PDE2 ----- [1347]  
#Gm19g27060 ----- [1347]  
#Sc\_GDE1 ----- [1347]  
#Ec\_glpQ ----- [1347]  
#Ec\_ugpQ ----- [1347]  
#Sc\_PGC1 ----- [1347]  
#At1g66980 KKMTLVGLWC IQPSPVDRPA MNRVEMMEG SLEALEVPPR PVLQQIPI SN LHESILSED VSVYTEG [1347]  
#At3g20520 ----- [1347]  
#At5g58050 ----- [1347]  
#At5g43300 ----- [1347]  
#At5g58170 ----- [1347]  
#Gg\_GDE2 ----- [1347]  
#Mm\_GDE3 ----- [1347]  
#Gm17g08680 ----- [1347]  
#Os03g40670 ----- [1347]  
#Stc\_glpQ1 ----- [1347]  
#Stc\_glpQ2 ----- [1347]  
#At5g41080 ----- [1347]  
#At3g02040 ----- [1347]  
#At1g71340 ----- [1347]  
#Hs\_GDE1/Mir16 ----- [1347]  
#Os02g31030 ----- [1347]  
#At1g74210 ----- [1347]  
#At5g55480 ----- [1347]  
#Sb03g035370 ----- [1347]  
#At4g26690 ----- [1347]  
#At5g08030 ----- [1347]  
#Sb04g021010 ----- [1347]  
#La\_GPX-PDE1 ----- [1347]  
#At1g66970 ----- [1347]
